# Supplementary material for: Phosphorylated and sumoylation-deficient progesterone receptors drive proliferative gene signatures during breast cancer progression
Source: Breast Cancer Res. 2012 Jun 14;14(3):R95. doi: 10.1186/bcr3211 (PMC3446358; doi:10.1186/bcr3211)
Supplement: Additional file 7 — The ligand-dependent (LD) and ligand-independent (LI) KR > WT gene signatures. For each gene signature, the gene names, normalized expression values, and the BH adjusted P values are provided for all biological samples and sample comparisons. The LD (151 genes) and LI (92 genes) KR > WT gene signature lists are provided in whole. [file bcr3211-S7.XLS]

## Sheet: Instructions
Additional file 7 - The ligand-dependent (LD) and ligand-independent (LI) KR>WT gene signatures.
Knutson et al.
This file contains all the KR > WT gene sets discussed in the article.
The full gene sets are provided in the two links below (links to other sheets in this Excel workbook):
Ligand-dependent KR > WT (151 genes)
Ligand-independent KR > WT (92 genes)

## Sheet: LD KR > WT
Probe ID	Gene Name	(null +ligand) vs (null –ligand) Expression	B-H p-value	(WT +ligand) vs (WT –ligand) Expression	B-H p-value	(KR +ligand) vs (KR –ligand) Expression	B-H p-value	(WT –ligand) vs (null –ligand) Expression	B-H p-value	(KR –ligand) vs (null –ligand) Expression	B-H p-value	(KR –ligand) vs (WT –ligand) Expression	B-H p-value	(WT +ligand) vs (null +ligand) Expression	B-H p-value	(KR +ligand) vs (null +ligand) Expression	B-H p-value	(KR +ligand) vs (WT +ligand) Expression	B-H p-value	[(WT +ligand) vs (WT –ligand)] vs [(null +ligand) vs (null –ligand)]	B-H p-value	[(KR +ligand) vs (KR –ligand)] vs [(null +ligand) vs (null –ligand)]	B-H p-value	[(KR +ligand) vs (KR –ligand)] vs [(WT +ligand) vs (WT –ligand)]	B-H p-value	null –ligand replicate1	null –ligand replicate2	null +ligand replicate1	null +ligand replicate2	WT –ligand replicate1	WT –ligand replicate2	WT +ligand replicate1	WT +ligand replicate2	KR –ligand replicate1	KR –ligand replicate2	KR +ligand replicate1	KR +ligand replicate2
ILMN_1737650	DIO2	0.132176	0.994666	-0.667595	2.9e-05	1.77166	3.81899e-15	0.523173	0.00132735	0.349403	0.0475447	-0.17377	0.536708	-0.276599	0.0882336	1.98889	7.90021e-17	2.26549	1.8241e-17	-0.799771	0.000625499	1.63949	9.81529e-10	2.43926	7.59548e-13	6.5036	6.37229	6.41693	6.72331	6.90293	7.01931	6.33488	6.25217	6.78999	6.78471	8.48642	8.6316
ILMN_1753648	SPRYD5	0.00197971	0.999328	0.0556909	0.848625	2.13533	3.03135e-16	-0.144802	0.55552	-0.00841321	0.982588	0.136388	0.702333	-0.0910904	0.702016	2.12494	2.06731e-16	2.21603	7.87823e-16	0.0537112	0.92281	2.13335	1.55288e-11	2.07964	6.8596e-10	5.99672	6.10999	6.07439	6.03627	5.73063	6.08647	5.73266	6.19582	6.04721	6.04266	8.24344	8.1171
ILMN_1697543	SPINK5L3	0.154522	0.990485	0.700207	1.96891e-05	2.64777	4.47618e-20	-0.0385838	0.898793	0.0563778	0.854822	0.0949617	0.797525	0.507102	0.00115497	2.54962	1.10369e-19	2.04252	8.3966e-16	0.545685	0.0328092	2.49325	3.14903e-14	1.94756	6.8596e-10	5.79891	5.88379	6.05283	5.93891	6.00778	5.59775	6.4929	6.51304	5.84502	5.95043	8.56755	8.52344
ILMN_1721626	ARID5B	0.0487642	0.997814	-1.89735	3.4e-15	0.0238697	0.95396	0.82493	4.62e-06	0.125614	0.637848	-0.699316	0.000309094	-1.12119	2.58e-09	0.100719	0.683678	1.22191	2.07e-09	-1.94612	7e-11	-0.0248946	0.974572	1.92122	1.56e-09	9.63109	9.64228	9.81983	9.55106	10.4971	10.4261	8.79658	8.33194	9.77579	9.7488	9.74084	9.83149
ILMN_1730995	AFAP1L2	0.192991	0.986712	-0.139365	0.560836	1.76121	1.04816e-13	-0.625822	0.000615663	-0.641065	0.000546033	-0.0152424	0.979465	-0.958178	2.04408e-07	0.927158	4.82808e-07	1.88534	1.18278e-13	-0.332355	0.326698	1.56822	3.65205e-08	1.90058	4.75499e-09	6.36063	6.76185	6.89946	6.609	5.92236	5.94848	5.71698	5.87513	6.03627	5.80408	7.82253	7.54025
ILMN_1701558	MAP1A	0.00547311	0.999277	0.549249	0.00046248	2.41179	3.72745e-19	0.0111827	0.971312	-0.115912	0.64133	-0.127095	0.690448	0.554959	0.000279024	2.29041	1.15981e-18	1.73545	4.36456e-14	0.543776	0.0276762	2.40632	3.95546e-14	1.86254	6.8596e-10	5.68791	5.57901	5.68534	5.59252	5.51959	5.76969	6.30016	6.08762	5.52419	5.5109	7.86149	7.99719
ILMN_1811014	PGR	0.0239773	0.997814	-0.966364	1.10772e-08	0.778681	1.35321e-06	3.13279	5.98983e-23	3.48781	2.58303e-24	0.355017	0.0736399	2.14245	2.54495e-18	4.24251	2.18794e-27	2.10006	6.58795e-17	-0.990341	1.64841e-05	0.754704	0.00112782	1.74505	1.53695e-09	5.38326	5.45706	5.43779	5.45047	8.48882	8.61707	7.6584	7.51476	8.85545	8.96048	9.78212	9.59117
ILMN_1687978	PHLDA1	0.0247157	0.997814	-1.00373	7.76952e-09	0.682893	2.16494e-05	-1.24999	8.33956e-11	-1.34658	1.5024e-11	-0.0965864	0.783256	-2.27844	7.81835e-19	-0.688401	1.21186e-05	1.59003	4.278e-13	-1.02844	1.26684e-05	0.658178	0.00686302	1.68662	4.75499e-09	9.75499	9.63386	9.72348	9.7148	8.50958	8.37929	7.36533	7.51609	8.32795	8.36774	9.16921	8.89227
ILMN_1759513	RND3	0.0980801	0.997255	-0.953797	1.33e-08	0.66432	2.17e-05	-0.246436	0.161389	-0.87029	2.35e-07	-0.623854	0.000338257	-1.29831	4.45e-12	-0.30405	0.0544427	0.994263	2.06e-08	-1.05188	5.12e-06	0.56624	0.0207575	1.61812	5.7e-09	8.16349	8.17277	8.27189	8.26053	7.82588	8.01751	7.06886	6.86694	7.28302	7.31266	7.93497	7.98935
ILMN_1683607	CYP1A2	-0.0641187	0.997255	-2.61251	2.17e-20	-0.999891	9.48e-09	2.16303	1.03e-17	0.425123	0.0107495	-1.73791	7.18e-14	-0.385355	0.0109243	-0.510648	0.000826877	-0.125293	0.611893	-2.54839	5.85e-15	-0.935772	6.42e-05	1.61262	8.71e-09	6.39548	6.22359	6.32585	6.16498	8.40554	8.5396	5.85024	5.86988	6.69617	6.77315	5.83747	5.63207
ILMN_1779875	THY1	0.262099	0.966119	0.151325	0.440041	1.76389	2.12356e-15	0.260001	0.14001	0.0278339	0.93321	-0.232167	0.329582	0.149226	0.416624	1.52963	7.45556e-14	1.3804	1.20304e-11	-0.110775	0.782488	1.50179	4.36712e-09	1.61257	8.11997e-09	5.36735	5.35155	5.63546	5.60764	5.66415	5.57475	5.63473	5.90682	5.36706	5.40751	7.22314	7.07922
ILMN_1753502	IGSF11	0.0865711	0.997255	-0.136096	0.484959	1.41622	4.39626e-13	0.165233	0.39206	-0.0142079	0.966842	-0.179441	0.484409	-0.0574338	0.790429	1.31544	2.07954e-12	1.37287	5.93373e-12	-0.222667	0.473792	1.32965	3.42155e-08	1.55231	8.7145e-09	6.53005	6.54917	6.59986	6.6525	6.62498	6.78471	6.63032	6.50717	6.48821	6.56259	7.925	7.95824
ILMN_2121408	HBEGF	0.193783	0.978564	0.415377	0.00899072	1.96289	1.80678e-16	-0.718343	1.45625e-05	-0.771135	5.0137e-06	-0.052792	0.896792	-0.496749	0.00108481	0.997967	8.43323e-09	1.49472	2.64565e-12	0.221594	0.508915	1.7691	1.46072e-10	1.54751	3.32821e-08	6.75896	6.96825	6.94995	7.16482	6.03828	6.25225	6.5108	6.61048	6.09018	6.09476	8.08135	8.02936
ILMN_1766951	MSX2	0.1525	0.989821	-0.144888	0.471533	1.36771	3.43641e-12	-0.158418	0.441578	0.0629306	0.828039	0.221348	0.369673	-0.455805	0.00244651	1.27815	1.33679e-11	1.73395	3.46322e-14	-0.297387	0.317494	1.21521	5.73606e-07	1.5126	4.22872e-08	6.92755	7.06573	7.28	7.01828	6.81075	6.8657	6.61648	6.77019	7.01151	7.10764	8.45365	8.40092
ILMN_2180232	UTS2D	-0.0866966	0.997255	2.44777	2.61215e-17	3.94074	1.58276e-23	-0.0277958	0.93834	0.0632759	0.85812	0.0910716	0.837025	2.50667	7.47764e-18	4.09071	2.02345e-24	1.58404	3.25814e-11	2.53447	6.90242e-13	4.02744	1.70639e-18	1.49297	1.8628e-06	5.48952	5.56436	5.33286	5.54762	5.65798	5.3403	8.21389	7.67993	5.59376	5.58667	9.38355	9.67836
ILMN_1797181	LOC93622	0.111615	0.994666	0.934229	9.61203e-08	2.42671	8.22125e-19	0.157315	0.472556	0.102656	0.702558	-0.0546594	0.896735	0.97993	2.27246e-08	2.41775	6.78594e-19	1.43782	1.7653e-11	0.822614	0.000654373	2.31509	3.2014e-13	1.49248	1.57785e-07	8.59115	8.59912	8.69558	8.71792	8.83536	8.66954	9.87941	9.49395	8.59522	8.80036	11.1255	11.1235
ILMN_1708881	RAB20	0.0574442	0.997255	-0.581496	0.00014337	0.86191	1.6855e-07	-0.037963	0.894934	-0.0498962	0.865801	-0.0119332	0.9815	-0.676903	8.66645e-06	0.754569	1.51043e-06	1.43147	3.38367e-12	-0.63894	0.00543349	0.804466	0.000477536	1.44341	7.60794e-08	7.10876	7.21367	7.2437	7.19362	7.16428	7.08222	6.43149	6.65203	7.10867	7.11397	7.90324	8.04321
ILMN_2197365	RGS2	-0.105049	0.995727	0.421104	0.00863972	1.85688	1.1631e-15	-0.2538	0.169678	-0.145746	0.532701	0.108054	0.751981	0.272353	0.0968904	1.81618	1.431e-15	1.54383	1.48038e-12	0.526153	0.0372245	1.96192	1.26263e-11	1.43577	2.01822e-07	6.1618	6.35286	6.1178	6.18677	5.84939	6.15768	6.48324	6.36603	6.12842	6.09476	7.90641	8.03052
ILMN_1693233	KIAA0513	0.138449	0.994666	0.710893	1.28279e-05	2.14371	2.16126e-17	-0.67367	5.32903e-05	-0.81612	2.31715e-06	-0.14245	0.647821	-0.101226	0.628641	1.18914	1.70871e-10	1.29037	1.3452e-10	0.572444	0.0212536	2.00526	8.32424e-12	1.43282	2.34713e-07	7.77735	7.95659	7.83422	8.17661	7.23782	7.14878	7.88572	7.92266	7.01424	7.08745	9.25376	9.13535
ILMN_3305614	ZNF812	-0.00418068	0.999277	1.99681	6.47917e-17	3.40809	7.41915e-24	0.200179	0.299003	1.15581	6.76945e-10	0.955627	2.72559e-07	2.20117	2.09769e-18	4.56808	4.71731e-28	2.36691	3.38665e-18	2.00099	3.90039e-12	3.41227	1.70639e-18	1.41129	2.01822e-07	5.85814	6.11451	5.95276	6.01152	6.1398	6.2332	8.25761	8.10901	7.15923	7.12503	10.4665	10.6339
ILMN_1684982	PDK4	-0.325457	0.960939	2.17456	1.04361e-17	3.57168	5.0564e-24	-0.275428	0.129	-0.379928	0.0304311	-0.1045	0.764408	2.22459	2.89143e-18	3.51721	2.02345e-24	1.29262	1.23175e-10	2.50002	1.79156e-14	3.89714	7.43493e-20	1.39712	3.50914e-07	6.56322	6.3102	6.18825	6.03425	6.10946	6.2131	8.44388	8.22781	5.97872	6.13484	9.60145	9.65546
ILMN_2153837	SCNN1G	0.0560412	0.997255	0.549057	0.00062343	1.9103	7.71175e-16	0.0807653	0.759274	0.0546907	0.858972	-0.0260746	0.957591	0.573781	0.000245127	1.90895	4.63358e-16	1.33517	7.1529e-11	0.493016	0.0598537	1.85426	7.81063e-11	1.36125	7.75596e-07	5.77189	5.8118	5.88461	5.81116	5.81949	5.92573	6.21763	6.6257	5.86741	5.82566	7.71341	7.80027
ILMN_1743373	DLL1	-0.134185	0.994666	0.185968	0.298516	1.5129	7.29458e-14	0.283007	0.0899789	0.107699	0.651244	-0.175308	0.500444	0.60316	4.25755e-05	1.75479	6.76627e-16	1.15163	4.92316e-10	0.320152	0.245401	1.64709	2.50608e-10	1.32693	2.85553e-07	6.36648	6.51752	6.35858	6.25705	6.67768	6.77233	6.90354	6.91841	6.52027	6.57913	8.01231	8.11289
ILMN_1791569	PLXNA1	0.0959237	0.997255	-0.191429	0.329235	1.12216	1.62423e-09	0.808986	2.97681e-06	0.200792	0.354095	-0.608193	0.00112343	0.521633	0.00086507	1.22703	1.09719e-10	0.705395	4.39627e-05	-0.287353	0.364777	1.02624	2.83494e-05	1.31359	1.71837e-06	7.25218	7.64348	7.55434	7.53317	8.33656	8.17707	8.07312	8.05766	7.71196	7.58529	8.82595	8.71561
ILMN_1762207	SGSM1	-0.134778	0.994666	-0.352506	0.0362881	0.950573	7.21488e-08	0.360096	0.0388071	0.193472	0.375495	-0.166624	0.573312	0.142367	0.470907	1.27882	3.51069e-11	1.13646	3.91207e-09	-0.217729	0.53372	1.08535	1.04983e-05	1.30308	1.86567e-06	6.87555	6.62734	6.63782	6.59551	7.1816	7.04148	6.91054	6.60752	6.97103	6.9188	7.97471	7.81626
ILMN_1691798	ZNF26	-0.0155615	0.997865	0.582694	8.30673e-05	1.86419	1.20492e-16	0.0606983	0.808629	0.026304	0.933917	-0.0343943	0.933313	0.658954	7.53474e-06	1.90605	3.85912e-17	1.2471	4.39901e-11	0.598256	0.00734522	1.87975	5.72368e-12	1.28149	4.10658e-07	8.41222	8.45638	8.37325	8.46423	8.48642	8.50358	9.0533	9.10209	8.4791	8.44211	10.378	10.2716
ILMN_1769201	ELF3	0.105352	0.997255	-2.55993	2.48e-19	-1.29752	5.91e-11	0.619962	0.000274785	0.480705	0.00607138	-0.139257	0.670592	-2.04532	9.82e-17	-0.922165	1.25e-07	1.12315	7.42e-09	-2.66528	7.99e-15	-1.40287	9.11e-08	1.26241	4.87e-06	9.33837	9.41239	9.47011	9.49134	9.93061	10.0601	7.6584	7.21242	9.82178	9.89038	8.61482	8.50231
ILMN_1786041	ASB9	0.149965	0.986712	0.89036	4.52556e-08	2.12356	3.96008e-18	0.125265	0.552904	0.0972629	0.691835	-0.0280021	0.949213	0.86566	5.58061e-08	2.07086	5.97408e-18	1.2052	1.55468e-10	0.740395	0.0008776	1.9736	2.78875e-12	1.2332	1.31147e-06	6.26481	6.35843	6.40868	6.51449	6.39847	6.4753	7.3281	7.32639	6.49836	6.3194	8.54427	8.52063
ILMN_1775708	SLC2A3	0.152105	0.990485	0.0586489	0.822301	1.27196	5.58295e-11	-0.0401186	0.894934	-0.127983	0.605472	-0.0878643	0.814294	-0.133575	0.501974	0.99187	1.58345e-08	1.12545	4.29766e-09	-0.0934565	0.832212	1.11985	5.33357e-06	1.21331	7.04958e-06	5.6494	5.8248	5.98253	5.79589	5.63689	5.75708	5.6907	5.82056	5.75463	5.46361	6.93258	6.82958
ILMN_1692177	TSC22D1	-0.0729979	0.997255	0.890521	3.23714e-07	2.08785	1.13507e-16	-0.182134	0.39158	-0.495982	0.00449389	-0.313849	0.173465	0.781385	2.67834e-06	1.66486	4.47235e-14	0.88348	1.10675e-06	0.963519	8.3084e-05	2.16085	2.86215e-12	1.19733	1.35095e-05	9.11656	9.1334	9.16132	8.94264	8.91993	8.96576	9.9797	9.68704	8.78872	8.46928	10.694	10.7397
ILMN_3287125	LOC340970	-0.259996	0.978564	0.354138	0.0552477	1.5241	4.19512e-12	-0.298187	0.135296	-0.273131	0.205886	0.0250562	0.963309	0.315948	0.0771085	1.51097	3.37995e-12	1.19502	7.26343e-09	0.614134	0.0246256	1.7841	1.51696e-09	1.16997	5.7993e-05	5.93675	5.56436	5.28738	5.69373	5.46361	5.44112	5.75075	5.86226	5.37432	5.58052	6.93258	7.07048
ILMN_1668822	BATF	0.027353	0.997814	-0.982436	5.86e-08	0.173561	0.482101	-0.491812	0.00469264	-0.177652	0.450176	0.31416	0.183799	-1.5016	1.24e-12	-0.0314438	0.914743	1.47016	1.91e-11	-1.00979	5.35e-05	0.146208	0.780751	1.156	3.44e-05	7.74489	7.47496	7.48947	7.78508	7.02741	7.20881	6.16381	6.10755	7.34492	7.51963	7.49154	7.72013
ILMN_1758619	SAG	0.0828273	0.997255	0.281607	0.0946116	1.43517	9.31284e-13	-0.0337167	0.909655	-0.000791241	0.998322	0.0329255	0.940147	0.165063	0.361295	1.35155	2.93795e-12	1.18649	5.78546e-10	0.198779	0.560596	1.35235	5.89837e-08	1.15357	9.78079e-06	5.74615	5.67195	5.867	5.71676	5.55824	5.79243	6.01188	5.902	5.71492	5.7016	7.2296	7.05726
ILMN_2403237	CHN2	0.0431586	0.997814	0.997867	1.5562e-08	2.14302	2.33458e-17	-0.113691	0.632165	0.244339	0.220859	0.35803	0.0892659	0.841017	3.93185e-07	2.3442	1.02247e-18	1.50318	3.38367e-12	0.954708	6.28852e-05	2.09986	2.88963e-12	1.14515	1.85628e-05	6.8624	7.18326	7.0981	7.03387	6.92775	6.89052	8.01046	7.80355	7.34289	7.19144	9.36204	9.45832
ILMN_1777853	MBOAT2	0.176229	0.986712	-0.214073	0.271541	0.915265	2.51202e-07	0.467261	0.00662318	0.547822	0.00163336	0.0805615	0.838799	0.0769598	0.7395	1.28686	5.18128e-11	1.2099	1.53097e-09	-0.390301	0.182548	0.739037	0.00366236	1.12934	3.96335e-05	6.64648	6.94129	7.09121	6.84901	7.33289	7.1894	6.956	7.13814	7.25966	7.42375	8.18375	8.33019
ILMN_2131861	SOCS2	-0.0818233	0.997255	0.328398	0.0604978	1.45538	3.07804e-12	0.839075	2.09165e-06	0.701731	5.5626e-05	-0.137344	0.678107	1.2493	9.77305e-11	2.23893	9.86689e-18	0.989636	1.26869e-07	0.410222	0.153501	1.5372	1.25258e-08	1.12698	3.96335e-05	6.26941	6.09687	6.09299	6.10964	7.00688	7.03754	7.55905	7.14217	6.94015	6.82958	8.42328	8.25721
ILMN_1810274	HOXB2	0.00428891	0.999277	-1.77617	1.97e-13	-0.681851	0.000262243	0.0245658	0.944837	-0.103496	0.743077	-0.128062	0.744728	-1.7559	2.05e-13	-0.789637	1.79e-05	0.966259	1.57e-06	-1.78046	3.99e-09	-0.68614	0.0200182	1.09432	0.000317541	9.46538	8.95898	9.22215	9.21079	9.27335	9.20015	7.62524	7.29591	9.25161	8.96576	8.53681	8.31686
ILMN_1681848	LOC399939	0.0387584	0.997814	-0.00482492	0.989195	1.08605	4.62883e-09	0.015335	0.962087	-0.0236919	0.948594	-0.0390269	0.931096	-0.0282484	0.913836	1.0236	1.1487e-08	1.05185	3.0414e-08	-0.0435833	0.933833	1.0473	2.40714e-05	1.09088	6.23381e-05	5.7513	5.72699	5.92691	5.62891	5.88297	5.626	5.62698	5.87234	5.7573	5.67361	6.76307	6.83996
ILMN_1716265	PGM2L1	-0.0561783	0.997814	-1.90867	9.45e-15	-0.823176	7.05e-06	1.04184	1.05e-07	0.483264	0.0106718	-0.558578	0.00727163	-0.810649	4.77e-06	-0.283734	0.141075	0.526915	0.00522456	-1.85249	6.29e-10	-0.766997	0.00497235	1.08549	0.000202253	7.38874	7.15398	7.3564	7.07396	8.22219	8.40421	6.54661	6.26245	7.85388	7.65536	7.09889	6.764
ILMN_3279169	LOC100134006	-0.0311808	0.997814	0.0410961	0.878386	1.1175	6.98906e-10	-0.139648	0.515498	-0.0532215	0.858532	0.0864264	0.811377	-0.067371	0.76116	1.09546	7.32219e-10	1.16283	1.03518e-09	0.072277	0.873059	1.14868	1.87159e-06	1.0764	3.44363e-05	5.73198	5.80902	5.72178	5.75687	5.526	5.73571	5.75075	5.59315	5.82692	5.60764	6.79524	6.87432
ILMN_1710027	PNMT	-0.100048	0.997255	0.497759	0.00142652	1.57235	8.42715e-14	0.0417807	0.885952	-0.0924459	0.727248	-0.134227	0.664864	0.639588	3.38773e-05	1.57995	4.83165e-14	0.940365	1.26202e-07	0.597807	0.0127588	1.6724	5.08413e-10	1.07459	3.75289e-05	6.21164	6.2292	6.09704	6.14371	6.42947	6.09494	6.76262	6.75731	6.18907	6.06688	7.74763	7.65302
ILMN_1691747	KHDRBS3	-0.0778189	0.997255	0.558913	0.000153568	1.63228	5.47239e-15	-0.295679	0.0680903	-0.230929	0.203989	0.0647501	0.860353	0.341054	0.0185157	1.47917	5.60239e-14	1.13812	4.3329e-10	0.636732	0.00395054	1.7101	6.34345e-11	1.07337	1.33855e-05	8.44963	8.48296	8.43876	8.33819	8.13394	8.2073	8.72141	8.73765	8.26976	8.20098	9.90157	9.83372
ILMN_1768534	BHLHB2	0.00901942	0.999277	-1.43891	5.12e-13	-0.367741	0.0267773	0.453837	0.00443792	0.477896	0.00333572	0.0240595	0.959073	-0.99409	4.5e-09	0.101136	0.643244	1.09523	2.8e-09	-1.44793	8.04e-09	-0.37676	0.208116	1.07117	2.97e-05	9.00164	9.04151	9.07568	8.98551	9.57473	9.3761	7.98192	8.09109	9.53849	9.46046	9.22672	9.03675
ILMN_1802205	RHOB	0.153479	0.986712	-0.241457	0.162003	0.824951	5.13408e-07	0.753128	4.41261e-06	1.05135	5.02122e-09	0.298221	0.165046	0.358191	0.0179695	1.72282	2.72658e-15	1.36463	1.63776e-11	-0.394936	0.137552	0.671472	0.00486298	1.06641	3.34471e-05	8.87421	8.7053	8.86741	9.01906	9.5317	9.55407	9.27778	9.32507	9.74392	9.93828	10.6045	10.7276
ILMN_1795930	PTGER4	0.0554241	0.997255	-0.165569	0.360411	0.892565	3.70457e-08	-0.179655	0.331865	-0.0014078	0.996668	0.178247	0.480576	-0.400648	0.0050416	0.835733	9.90038e-08	1.23638	5.53773e-11	-0.220993	0.46977	0.837141	0.000164542	1.05813	1.76844e-05	7.42805	7.40165	7.45949	7.48106	7.27759	7.1928	7.12097	7.01828	7.45618	7.37071	8.29355	8.31847
ILMN_1713124	AKR1C3	0.0612388	0.997255	0.622689	3.42786e-05	1.66613	3.97417e-15	-0.129828	0.528688	0.492805	0.00165029	0.622634	0.000249514	0.431621	0.00267054	2.0977	3.15679e-18	1.66607	3.14657e-14	0.56145	0.0140586	1.60489	3.8768e-10	1.04344	2.58681e-05	5.57044	5.57057	5.53898	5.72451	5.43419	5.44717	6.0923	6.03443	6.03186	6.09476	7.73875	7.72013
ILMN_1766650	FOXA1	0.124487	0.994666	-2.3745	1.95e-19	-1.33598	3e-12	0.304428	0.067103	0.358936	0.0313097	0.0545073	0.888869	-2.19456	9.14e-19	-1.10153	2.94e-10	1.09303	2.03e-09	-2.49899	4.93e-15	-1.46046	5.56e-09	1.03852	3.75e-05	11.4677	11.4677	11.634	11.5504	11.7949	11.7493	9.44902	9.34619	11.7683	11.885	10.5896	10.3917
ILMN_1661599	DDIT4	0.0201584	0.997814	0.372947	0.0291782	1.39762	9.37023e-12	0.345456	0.0551406	0.0770447	0.795523	-0.268412	0.278579	0.698245	1.94968e-05	1.4545	2.09286e-12	0.756257	1.94814e-05	0.352789	0.245725	1.37746	1.45777e-07	1.02467	0.000179433	10.7147	11.1095	10.9327	10.9318	11.2175	11.2976	11.755	11.506	11.0186	10.9597	12.4594	12.3141
ILMN_1748840	CALB2	0.0635742	0.997255	0.930985	6.70757e-08	1.95559	3.03135e-16	-0.743613	1.02487e-05	-0.965072	7.54161e-08	-0.221459	0.386821	0.123797	0.536925	0.926944	6.00546e-08	0.803147	3.82196e-06	0.867411	0.000251584	1.89202	3.88756e-11	1.02461	0.000108584	7.07155	6.79524	6.86929	7.12464	6.25572	6.12384	7.12856	7.11297	6.00974	5.92691	7.97768	7.87014
ILMN_1652464	TUBA3E	-0.0757182	0.997255	1.28429	1.24029e-11	2.30793	7.2465e-19	-0.144481	0.490476	-0.0669788	0.812183	0.0775024	0.834018	1.21553	3.56084e-11	2.31667	4.75493e-19	1.10114	2.68904e-09	1.36001	3.5467e-08	2.38365	3.06083e-14	1.02363	6.64134e-05	5.80107	5.91401	5.91102	5.65263	5.70435	5.72178	7.05153	6.94319	5.82183	5.7593	8.15536	8.04162
ILMN_2305407	ZBTB16	0.0332498	0.997814	1.55679	4.67583e-12	2.58031	2.82516e-18	0.0305207	0.930285	-0.0169529	0.967314	-0.0474735	0.922646	1.55406	3.5008e-12	2.53011	3.60334e-18	0.976046	9.35553e-07	1.52354	9.42025e-08	2.54706	3.64372e-13	1.02352	0.000653708	5.91082	5.60887	5.83221	5.75398	5.84502	5.73571	7.62232	7.07199	5.69511	5.79068	8.41528	8.23113
ILMN_1762021	TRIM48	-0.0789208	0.997255	0.0327836	0.90696	1.04511	3.8911e-09	-0.112903	0.623703	-0.151038	0.506528	-0.0381355	0.929639	-0.0011982	0.995769	0.972995	1.29212e-08	0.974193	5.72847e-08	0.111704	0.784539	1.12403	2.95966e-06	1.01233	9.61665e-05	5.95305	6.00965	5.7513	6.05355	5.89292	5.84397	5.96667	5.83579	5.86473	5.79589	6.81117	6.93968
ILMN_1656951	APCDD1	0.0179911	0.997814	-0.420735	0.00600027	0.583842	0.000171362	0.747628	4.06e-06	0.125026	0.59037	-0.622601	0.000359168	0.308902	0.0426201	0.690877	7.31e-06	0.381976	0.0220492	-0.438726	0.0814662	0.565851	0.0211497	1.00458	7.14e-05	7.4763	7.32429	7.38163	7.45494	8.14967	8.14618	7.69557	7.75881	7.46878	7.58187	8.00955	8.20878
ILMN_2388800	PPAP2B	0.0246711	0.997814	-0.652796	2.98e-05	0.345606	0.0413532	-0.00809617	0.979062	-0.0126823	0.972446	-0.00458615	0.993068	-0.685563	8.67e-06	0.308252	0.0552332	0.993816	2.99e-08	-0.677467	0.00341482	0.320935	0.329412	0.998402	9.86e-05	9.03501	8.79925	8.90712	8.97648	8.89258	8.92549	8.31076	8.20171	8.91589	8.89301	9.34812	9.15198
ILMN_1700967	C3orf59	-0.0328792	0.997814	-1.06655	2.31e-09	-0.0701386	0.821176	-0.484636	0.00291063	-0.118644	0.630137	0.365991	0.0732523	-1.51831	1.64e-13	-0.155904	0.434304	1.3624	2.54e-11	-1.03367	1.32e-05	-0.0372594	0.958267	0.996413	0.000129633	8.56379	8.25138	8.39056	8.35886	7.8979	7.948	6.80506	6.90774	8.21959	8.35829	8.15536	8.28224
ILMN_3202883	LOC440040	-0.0760176	0.997255	-0.0813655	0.715404	0.901609	4.35196e-08	-0.0655947	0.795591	-0.0781916	0.766665	-0.0125969	0.980068	-0.0709426	0.734638	0.899435	2.9283e-08	0.970378	2.64275e-08	-0.00534793	0.99174	0.977627	1.76689e-05	0.982975	7.78363e-05	5.89717	6.00965	5.79698	5.9578	5.82968	5.94595	5.79979	5.8131	5.90541	5.84502	6.79756	6.75609
ILMN_1724832	OVOL2	-0.0737736	0.997255	-0.437987	0.00613483	0.541355	0.000840336	0.225058	0.239081	0.184564	0.394655	-0.0404936	0.925527	-0.139155	0.473278	0.799693	1.09e-06	0.938848	1.72e-07	-0.364213	0.200598	0.615129	0.0151177	0.979342	0.000198804	8.98065	8.98868	8.91575	8.90603	9.19417	9.22528	8.82555	8.71792	9.15135	9.18711	9.51489	9.90628
ILMN_3229324	SGK1	-0.0921913	0.997255	1.6964	1.075e-14	2.67418	1.49053e-20	1.60289	1.22867e-13	0.979392	4.06057e-08	-0.6235	0.000558225	3.39148	4.9162e-24	3.74576	2.58807e-25	0.354276	0.0454584	1.78859	9.58238e-11	2.76637	7.01891e-16	0.977776	0.000179433	7.10518	6.94665	6.94114	6.92632	8.73318	8.52444	10.4457	10.2048	7.93638	8.07424	10.6504	10.7085
ILMN_1781514	PCDH17	-0.00230079	0.999277	-0.46183	0.0017417	0.507167	0.000775417	1.33465	3.54e-12	1.10355	5.87e-10	-0.231097	0.303909	0.875122	3.23e-08	1.61302	5.28e-15	0.7379	4.43e-06	-0.45953	0.0551682	0.509467	0.0376645	0.968997	7.78e-05	5.73718	5.77311	5.74594	5.75975	7.07952	7.10007	6.58478	6.67114	6.91374	6.80366	7.31285	7.41888
ILMN_1661994	ESRRG	0.08338	0.997255	0.27876	0.0853903	1.24748	1.58034e-11	-0.0717623	0.774023	-0.0279984	0.930836	0.0437639	0.912692	0.123618	0.506665	1.1361	1.15121e-10	1.01248	1.02777e-08	0.19538	0.552618	1.1641	6.80576e-07	0.968719	0.000101734	5.83158	5.88868	5.93154	5.95547	5.87767	5.69906	6.1432	5.99105	5.80945	5.85481	7.09354	7.06568
ILMN_1653496	GLUL	-0.0420183	0.997814	0.289118	0.0768374	1.25662	1.85017e-11	0.18235	0.342398	0.149873	0.496708	-0.0324762	0.939965	0.513486	0.000500824	1.44852	2.54412e-13	0.93503	7.81298e-08	0.331136	0.234355	1.29864	9.20236e-08	0.967506	0.000127441	6.2893	6.37909	6.2131	6.37126	6.5756	6.45749	6.88489	6.72644	6.49169	6.47645	7.7997	7.68169
ILMN_2386179	ZMYND8	-0.0244627	0.997814	-0.762898	1.32e-06	0.201122	0.318655	-0.19717	0.290543	0.0670628	0.807362	0.264233	0.230527	-0.935605	1.25e-08	0.292647	0.0649699	1.22825	1.23e-10	-0.738435	0.00102081	0.225585	0.556357	0.96402	0.000124209	8.69814	8.76915	8.78154	8.63682	8.5678	8.50515	7.76243	7.78473	8.82104	8.78038	8.8985	9.10517
ILMN_2275098	DTX2	-0.173035	0.986712	0.157811	0.440452	1.11899	1.4076e-09	1.05729	9.68489e-09	0.651326	0.000117183	-0.405966	0.0439518	1.38814	3.30442e-12	1.94335	2.56396e-16	0.55521	0.00112762	0.330847	0.267912	1.29202	3.12514e-07	0.961176	0.00030957	8.97799	8.86112	8.77149	8.72155	10.0652	9.88851	10.3213	9.94803	9.54628	9.59547	10.6952	10.6846
ILMN_1770635	SOX2	-0.0194607	0.997814	-3.16324	1.35e-23	-2.20521	9.74e-19	1.95443	7.03e-17	1.92989	1.53e-16	-0.0245337	0.956778	-1.18935	2.61e-11	-0.255851	0.110846	0.933504	5.1e-08	-3.14378	3.15e-18	-2.18574	1.24e-13	0.958038	0.000105726	8.32843	8.26668	8.3048	8.25138	10.3159	10.1881	7.1157	7.06177	10.2743	10.1806	7.96782	8.07666
ILMN_2095759	OGFRL1	-0.140103	0.994666	1.09929	1.53748e-09	2.05082	7.56271e-17	-0.448302	0.00695905	-0.391136	0.0250166	0.0571663	0.889251	0.791089	1.17873e-06	1.79979	2.09275e-15	1.0087	4.1583e-08	1.23939	5.46466e-07	2.19092	8.15953e-13	0.951531	0.000317541	7.26272	7.15923	6.93557	7.20617	6.67914	6.8462	7.925	7.79892	6.72087	6.9188	8.83029	8.91102
ILMN_1672403	ADAMTS8	0.105486	0.997255	0.346748	0.0520738	1.29007	1.46226e-10	0.200015	0.351237	0.261232	0.213064	0.0612176	0.888438	0.441277	0.00729783	1.44582	4.58576e-12	1.00454	1.59508e-07	0.241262	0.501546	1.18458	4.87659e-06	0.943322	0.000829312	5.6277	5.84544	5.80215	5.88196	5.89292	5.98025	6.28245	6.28422	5.78786	6.20774	7.41466	7.16108
ILMN_1754114	FLJ20021	0.0312128	0.997814	-0.358521	0.0294722	0.583375	0.000317291	0.420504	0.0117766	0.401864	0.0203503	-0.0186396	0.969813	0.0307703	0.902614	0.954026	2.93e-08	0.923256	2.43e-07	-0.389734	0.162038	0.552162	0.0357594	0.941896	0.00035293	8.83489	8.92238	8.97667	8.84303	9.31138	9.2869	9.0385	8.84273	9.39797	9.16303	9.75224	9.97551
ILMN_2132982	IGFBP5	-0.0693865	0.997255	-1.16784	3.48e-09	-0.228321	0.332146	2.33508	4.34e-17	2.15508	7.7e-16	-0.179994	0.574979	1.23662	5.87e-10	1.99615	1.62e-15	0.759526	4.77e-05	-1.09845	2.91e-05	-0.158934	0.768893	0.939519	0.00140205	9.91702	9.74632	9.76423	9.76033	12.0405	12.293	11.2621	10.7357	11.9238	12.0497	11.761	11.7558
ILMN_1672004	TOB1	0.0306931	0.997814	-1.37404	1.76e-12	-0.43462	0.00645462	0.173152	0.379964	0.121965	0.60605	-0.0511867	0.897677	-1.23158	2.23e-11	-0.343348	0.0279204	0.888231	2.55e-07	-1.40473	1.54e-08	-0.465313	0.081935	0.939418	0.000218939	10.1265	10.3622	10.3033	10.2468	10.4613	10.3736	9.1291	8.95775	10.3601	10.3725	9.90203	9.96129
ILMN_1657571	ASNA1	-0.0291678	0.997814	-0.611153	0.00153512	0.327802	0.159734	0.312991	0.162953	0.0200218	0.963529	-0.292969	0.327355	-0.268995	0.199849	0.376991	0.0624074	0.645986	0.00167072	-0.581986	0.0657196	0.356969	0.412481	0.938955	0.00458121	6.54674	6.74033	6.76007	6.46866	6.96295	6.9501	6.26714	6.4236	6.40959	6.91751	6.74274	7.23997
ILMN_1702487	SGK	0.253909	0.978564	1.87443	1.60582e-15	2.81316	1.00715e-20	1.93381	1.54831e-15	1.23932	3.70856e-10	-0.694482	0.000187466	3.55432	3.42147e-24	3.79858	3.78897e-25	0.244253	0.240941	1.62052	2.35804e-09	2.55925	2.02982e-14	0.938735	0.000528745	6.87663	7.02755	7.27003	7.14196	8.82205	8.94974	10.9537	10.5669	8.13257	8.25025	11.0195	10.9897
ILMN_1791447	CXCL12	-0.0898376	0.997255	0.951006	1.25554e-08	1.8882	1.74158e-16	0.0853419	0.719188	-0.0176183	0.958749	-0.10296	0.751434	1.12619	1.5055e-10	1.96042	3.6369e-17	0.834238	6.44683e-07	1.04084	5.65046e-06	1.97804	2.91127e-12	0.937199	0.000179433	6.03901	5.95062	5.99879	5.81116	6.04503	6.11528	7.06886	6.99347	5.97872	5.97567	7.93239	7.79841
ILMN_1661755	FAM129B	0.11423	0.994666	0.286091	0.0946836	1.22002	1.04701e-10	-0.159302	0.446844	-0.306292	0.0936254	-0.14699	0.6265	0.0125584	0.962494	0.799497	9.82845e-07	0.786939	4.58594e-06	0.171861	0.638007	1.10579	4.87962e-06	0.933929	0.00036092	11.4132	11.4964	11.6599	11.4782	11.309	11.2821	11.6558	11.5074	11.0276	11.2694	12.462	12.2751
ILMN_1734833	NBN	-0.0946578	0.997255	-0.42587	0.00684406	0.506695	0.00155616	-0.0716966	0.784195	-0.247976	0.197598	-0.17628	0.523009	-0.402908	0.00809004	0.353377	0.0262209	0.756285	7.89e-06	-0.331212	0.249833	0.601353	0.0159571	0.932564	0.000319586	8.75408	8.88449	8.71255	8.7367	8.69263	8.80254	8.29435	8.34908	8.68339	8.45922	9.1933	8.9627
ILMN_2215639	TUBA3D	-0.00580859	0.999277	1.30662	3.60603e-12	2.23856	7.2465e-19	-0.0372056	0.894934	-0.0825548	0.750643	-0.0453493	0.90756	1.27522	4.72043e-12	2.16181	1.47953e-18	0.886593	1.63083e-07	1.31243	3.99352e-08	2.24437	6.4385e-14	0.931942	0.000171341	5.77453	5.82756	5.79156	5.79891	5.76041	5.76726	7.00875	7.13216	5.64629	5.79068	8.01632	7.89778
ILMN_1760087	SLC26A3	0.109472	0.994666	0.788055	2.04769e-06	1.71868	1.39738e-14	-0.105381	0.664897	0.451521	0.00837686	0.556901	0.00285936	0.573203	0.000228999	2.06073	4.41899e-17	1.48753	4.37327e-12	0.678583	0.00482381	1.60921	2.17246e-09	0.930627	0.000453543	5.34342	5.5674	5.51869	5.61107	5.34001	5.36005	6.25445	6.02172	6.03407	5.77979	7.65695	7.59428
ILMN_1809931	NDRG1	-0.190298	0.978564	1.39944	4.12334e-13	2.30766	2.51925e-19	-0.446099	0.0037323	-0.317823	0.0574022	0.128275	0.662116	1.14364	6.36999e-11	2.18013	9.24375e-19	1.0365	4.47955e-09	1.58973	3.87257e-10	2.49796	2.45116e-15	0.908224	0.000219242	10.5783	10.6351	10.3603	10.4724	10.1247	10.1965	11.5921	11.528	10.2295	10.3482	12.6023	12.5907
ILMN_3235379	LOC100134265	-0.000818378	0.999502	0.459226	0.00214505	1.36639	1.26476e-12	-0.367041	0.0206119	-0.636702	5.64619e-05	-0.269661	0.209936	0.0930035	0.63702	0.730504	1.96364e-06	0.637501	6.32748e-05	0.460044	0.0588401	1.36721	1.96165e-08	0.907162	0.00025708	6.58366	6.49022	6.5277	6.54454	6.10946	6.23033	6.64005	6.6182	5.96322	5.83726	7.32818	7.20507
ILMN_2369666	CR2	-0.0119532	0.999277	0.0528451	0.848966	0.958766	1.04091e-07	-0.244943	0.214844	-0.0207689	0.955377	0.224174	0.404207	-0.180145	0.348848	0.94995	8.13311e-08	1.1301	7.87914e-09	0.0647983	0.897671	0.970719	0.000103551	0.905921	0.00108641	6.0195	6.0369	5.91799	6.11451	5.77408	5.79243	5.7455	5.92671	6.12842	5.88645	6.78721	7.14518
ILMN_3232519	LOC100129129	-0.078948	0.997255	0.145808	0.455993	1.04552	2.01918e-09	-0.419332	0.00842449	-0.776817	2.41055e-06	-0.357484	0.0696615	-0.194577	0.248646	0.347651	0.0244287	0.542228	0.000792506	0.224756	0.480536	1.12447	1.80738e-06	0.899712	0.00036204	7.60846	7.51956	7.57204	7.39809	7.10387	7.18549	7.2685	7.31247	6.88678	6.68762	7.83459	7.83084
ILMN_1813270	ELF5	0.02457	0.997814	-1.8755	3.58e-16	-0.976042	1.52e-08	0.422438	0.00906839	0.517519	0.00150042	0.0950813	0.786223	-1.47763	2.27e-13	-0.483092	0.00152254	0.994541	3.04e-08	-1.90007	1.36e-11	-1.00061	2.06e-05	0.89946	0.000458387	11.8544	11.7458	11.8444	11.8049	12.2367	12.2084	10.448	10.246	12.4137	12.2216	11.4204	11.2628
ILMN_1799642	TRIM24	-0.0379228	0.997814	-0.0631018	0.801696	0.83062	7.36498e-07	0.105792	0.657747	0.364393	0.0374154	0.258601	0.27419	0.0806127	0.710121	1.23294	4.97349e-11	1.15232	1.65963e-09	-0.025179	0.960961	0.868542	0.000268114	0.893721	0.000686716	8.50958	8.60717	8.46373	8.57717	8.55162	8.77671	8.70193	8.5002	9.01403	8.83151	9.70761	9.79917
ILMN_1703955	FBXO32	-0.0966901	0.997255	-1.01342	6.95e-09	-0.12147	0.635328	-0.144168	0.502422	-0.357554	0.0403678	-0.213387	0.399746	-1.06089	1.6e-09	-0.382335	0.0152395	0.678559	4.85e-05	-0.916725	8.54e-05	-0.0247803	0.973199	0.891945	0.000643591	9.45724	9.12305	9.1725	9.21441	9.14552	9.14644	8.11228	8.15285	8.92343	8.94176	8.89195	8.7303
ILMN_2201413	SLC37A2	-0.0885866	0.997255	0.379053	0.0203324	1.26895	4.62319e-11	-0.00725158	0.982525	0.0529391	0.862836	0.0601907	0.882588	0.460388	0.00280044	1.41048	1.81405e-12	0.950092	1.43536e-07	0.467639	0.0744717	1.35754	9.20236e-08	0.889901	0.000812342	5.25612	5.51631	5.3221	5.27316	5.32013	5.43779	5.75075	5.76528	5.51709	5.36122	6.83464	6.58158
ILMN_1713744	C14orf132	-0.0819995	0.997255	-0.198254	0.271864	0.675709	1.86089e-05	-0.321588	0.0538248	-0.351945	0.0381439	-0.0303568	0.944836	-0.437843	0.00309367	0.405764	0.00763221	0.843607	6.61322e-07	-0.116255	0.771294	0.757709	0.00110425	0.873964	0.000607218	10.0862	10.1744	10.1806	9.91592	9.85471	9.76264	9.6471	9.57374	9.8009	9.75574	10.4682	10.4399
ILMN_1712894	FUT1	-0.0480436	0.997814	-0.572472	0.000240735	0.30024	0.0939863	0.309118	0.072215	0.0563258	0.847915	-0.252793	0.280028	-0.21531	0.203842	0.404609	0.00920962	0.619919	0.000176256	-0.524429	0.0338492	0.348284	0.274715	0.872712	0.000803883	6.4688	6.36166	6.42584	6.30853	6.63388	6.81481	6.27556	6.02819	6.48426	6.45885	6.82482	6.71877
ILMN_1731648	FOXJ2	-0.0536795	0.997255	0.287709	0.065989	1.14966	7.38304e-11	-0.323858	0.0411953	-0.27633	0.105879	0.0475275	0.901888	0.0175309	0.94195	0.927005	9.41406e-09	0.909474	6.52477e-08	0.341389	0.192283	1.20334	2.11439e-07	0.861947	0.000403276	8.93579	8.98689	8.86479	8.95054	8.66475	8.61022	8.92599	8.9244	8.64071	8.72931	9.82039	9.84895
ILMN_1656938	LOC731486	0.219426	0.978564	1.0102	2.63588e-08	1.86763	3.67521e-15	0.17052	0.436612	0.196151	0.38358	0.0256316	0.960017	0.961292	5.17357e-08	1.84435	3.24129e-15	0.883062	1.32324e-06	0.790772	0.00136893	1.6482	2.87322e-09	0.857431	0.00225288	5.96224	5.63207	6.03937	5.99379	5.93675	5.9986	6.93307	7.02268	5.80945	6.17717	7.84384	7.87803
ILMN_1780598	PIAS1	-0.0521303	0.997255	-0.100688	0.644678	0.754969	2.60637e-06	0.175128	0.372116	-0.182317	0.379138	-0.357445	0.0725264	0.126571	0.504394	0.624782	4.3289e-05	0.498212	0.00223313	-0.0485577	0.920658	0.807099	0.000483877	0.855657	0.000813906	8.68007	8.74004	8.56028	8.75558	8.84717	8.9232	8.79795	8.77104	8.63557	8.41992	9.25784	9.30759
ILMN_1699676	C14orf147	-0.00616279	0.999277	-0.0741086	0.755092	0.775661	1.89019e-06	0.212953	0.256452	-0.482828	0.00322437	-0.695781	8.37321e-05	0.145007	0.436763	0.298996	0.0653576	0.153988	0.503496	-0.0679458	0.881697	0.781824	0.00086261	0.849769	0.0010236	9.63574	9.492	9.6902	9.42522	9.73157	9.82208	9.64814	9.75729	9.11535	9.04674	9.83977	9.87364
ILMN_1758404	TFAP2B	-0.143355	0.990485	-1.61778	1.96e-14	-0.769805	1.82e-06	-0.0689369	0.789274	0.211894	0.283175	0.280831	0.199409	-1.54336	5.02e-14	-0.414556	0.00642793	1.12881	1.4e-09	-1.47442	4.97e-09	-0.62645	0.00930644	0.847974	0.000926822	9.31345	9.07696	9.08316	9.02053	9.17455	9.07798	7.58767	7.4293	9.42644	9.38775	8.66387	8.61072
ILMN_2094856	RANBP3L	0.116521	0.994666	1.0572	2.16638e-09	1.90276	3.03135e-16	0.151294	0.468146	0.179021	0.399609	0.027727	0.952138	1.09198	6.43304e-10	1.96526	7.40483e-17	0.873279	4.58372e-07	0.940683	5.06726e-05	1.78624	8.23365e-11	0.845552	0.00113902	5.75398	5.8248	5.82968	5.98215	6.04684	5.83453	7.10567	6.89011	5.94048	5.99634	7.88851	7.85383
ILMN_2188204	ATG12	0.0135184	0.999277	0.345323	0.0291057	1.18706	9.14201e-11	-0.0387998	0.892429	0.083626	0.753823	0.122426	0.693206	0.293005	0.0580047	1.25717	1.30721e-11	0.964162	4.47332e-08	0.331805	0.235533	1.17354	8.20886e-07	0.841737	0.000978845	9.06693	9.16517	9.00615	9.25299	9.04577	9.10873	9.35513	9.49003	9.20171	9.19765	10.3962	10.3773
ILMN_2376953	KCNK2	0.11147	0.994666	-0.719433	4.21e-06	0.11831	0.632263	1.15049	3.37e-10	0.801342	1.23e-06	-0.349143	0.0782724	0.319582	0.0344011	0.808181	3.63e-07	0.488599	0.00248799	-0.830903	0.000225899	0.00683943	0.991506	0.837743	0.000945053	5.71423	5.80064	5.93891	5.79891	6.88805	6.9278	6.08239	6.29459	6.59756	6.52	6.67503	6.67914
ILMN_1681515	CRLF1	0.130535	0.994666	0.0455744	0.862952	0.882494	1.30172e-07	0.301855	0.0766436	0.268908	0.142882	-0.032947	0.939953	0.216895	0.193759	1.02087	3.13126e-09	0.803973	2.0002e-06	-0.0849603	0.843267	0.751959	0.00135902	0.83692	0.00119299	6.54981	6.63388	6.67044	6.77431	6.95755	6.82984	6.81813	7.06042	6.7987	6.92281	7.71887	7.76762
ILMN_2406656	GATA3	-0.0260656	0.997814	-1.53263	7.49e-14	-0.696071	1.07e-05	0.20216	0.280257	0.226652	0.23722	0.0244924	0.95813	-1.30441	4.38e-12	-0.443353	0.00324284	0.861055	4.18e-07	-1.50657	2.73e-09	-0.670005	0.00449437	0.836563	0.00103118	10.8249	10.869	10.8213	10.8205	11.1108	10.9875	9.57993	9.45304	11.0334	11.1138	10.4885	10.2666
ILMN_2228463	DDC	0.175775	0.986712	0.723414	1.36446e-05	1.55565	3.80139e-13	0.0837659	0.751944	0.397748	0.0261529	0.313982	0.168616	0.631405	7.70567e-05	1.77762	5.41829e-15	1.14622	3.94083e-09	0.547639	0.0342333	1.37987	1.08152e-07	0.832236	0.00263232	5.17965	5.51631	5.48952	5.55799	5.35007	5.51342	6.29082	6.0195	5.72949	5.76196	7.32713	7.27562
ILMN_1720158	ETS2	0.0962123	0.997255	0.730339	3.97912e-06	1.55918	6.40211e-14	0.19592	0.304099	-0.144112	0.52205	-0.340032	0.0922747	0.830047	2.22229e-07	1.31886	4.07714e-12	0.488812	0.0027977	0.634127	0.0063135	1.46297	7.77871e-09	0.828844	0.00129065	6.26621	6.24561	6.20628	6.49796	6.43655	6.4671	7.17613	7.1882	6.14778	6.07581	7.61995	7.72201
ILMN_2073732	CBLL1	0.116234	0.994666	1.00962	3.54083e-09	1.83754	4.03694e-16	-0.226411	0.208945	-0.205397	0.297074	0.021014	0.96517	0.666979	1.01525e-05	1.51591	6.38793e-14	0.848931	4.97698e-07	0.89339	7.56331e-05	1.72131	1.17109e-10	0.827917	0.00108641	8.977	9.10859	9.24609	9.07198	8.83103	8.80174	9.87116	9.78086	8.76396	8.91084	10.6673	10.6826
ILMN_1710209	MFSD6	-0.00493091	0.999277	0.0402084	0.874307	0.866796	7.32574e-08	0.124881	0.545752	0.152319	0.467675	0.0274383	0.949549	0.17002	0.310643	1.02405	9.69356e-10	0.854026	2.54508e-07	0.0451393	0.923219	0.871727	8.81829e-05	0.826587	0.000788395	8.70382	8.72237	8.76741	8.64891	8.78337	8.89258	8.86394	8.89243	8.85907	8.87176	9.71358	9.75084
ILMN_1807201	FAM104A	0.0871285	0.997255	1.32105	4.58059e-12	2.14152	5.30632e-18	-0.0370557	0.897414	-0.155901	0.474307	-0.118846	0.705253	1.19687	4.14596e-11	1.89849	1.15852e-16	0.70162	1.83779e-05	1.23393	2.48033e-07	2.05439	1.51628e-12	0.820466	0.00136828	8.99248	8.86561	8.9146	9.11775	8.84363	8.94035	10.1699	10.2562	8.77851	8.76777	10.8501	10.9792
ILMN_1765686	LOC642362	-0.148801	0.990485	-0.0836668	0.713585	0.732719	4.60042e-06	-0.0794085	0.749812	-0.0879105	0.738008	-0.00850201	0.987732	-0.0142738	0.956126	0.79361	6.28428e-07	0.807884	1.57369e-06	0.0651346	0.885811	0.881521	0.000135558	0.816386	0.00150373	6.08913	6.16197	6.01968	5.93381	5.92027	6.172	5.89454	6.0304	6.04102	6.03425	6.7987	6.74201
ILMN_1761093	B3GAT1	-0.0940288	0.997255	1.00358	2.62224e-08	1.81936	6.16599e-15	-0.305139	0.0985456	-0.15522	0.520258	0.149918	0.638639	0.792472	2.14717e-06	1.75817	9.84754e-15	0.965695	2.00495e-07	1.09761	1.04437e-05	1.91339	6.34345e-11	0.815776	0.00367499	6.02172	6.0799	6.06167	5.85189	5.70435	5.78699	6.80641	6.6921	5.73763	6.05355	7.57606	7.85383
ILMN_1803811	TRIB1	0.33364	0.960939	0.585434	0.000326185	1.39922	6.42335e-12	0.0139114	0.965373	-0.0563708	0.856393	-0.0702822	0.864238	0.265705	0.118689	1.00921	1.48164e-08	0.743506	2.07845e-05	0.251794	0.453877	1.06558	1.71416e-05	0.813788	0.00339289	7.43055	7.47996	7.80344	7.77435	7.57392	7.36441	8.04091	8.06829	7.28472	7.51305	8.62372	8.97249
ILMN_1754600	FNBP1L	-0.0481671	0.997814	-0.481231	0.00204539	0.328865	0.0592958	0.602824	0.000200338	0.516242	0.00171646	-0.0865823	0.811387	0.16976	0.348257	0.893275	8.34e-08	0.723515	1.62e-05	-0.433064	0.098187	0.377033	0.219754	0.810097	0.0021466	9.609	9.6763	9.62292	9.56605	10.3025	10.1885	9.92541	9.60308	10.2065	10.1113	10.4767	10.4988
ILMN_1775380	SMOX	-0.128645	0.994666	0.528327	0.000524394	1.3352	4.0284e-12	-0.149022	0.467056	-0.372815	0.0260467	-0.223793	0.350549	0.507949	0.000593589	1.09102	4.87241e-10	0.583076	0.000311441	0.656971	0.00418036	1.46384	6.78755e-09	0.806869	0.00169633	6.58366	6.65691	6.55006	6.43322	6.40437	6.53816	7.10663	6.89255	6.26886	6.22608	7.62609	7.53924
ILMN_1738491	SNX30	-0.0727111	0.997255	1.02445	2.2509e-09	1.8311	3.91596e-16	0.0870026	0.712091	0.191249	0.338443	0.104246	0.747643	1.18416	3.99698e-11	2.09506	4.97373e-18	0.910898	1.1223e-07	1.09716	1.96922e-06	1.90381	7.28311e-12	0.806651	0.00143058	7.76544	7.76809	7.68066	7.70744	7.83284	7.87468	8.83389	8.92253	7.88615	8.02987	9.692	9.88622
ILMN_1701007	PON3	-0.152861	0.990485	-0.597641	0.000178006	0.208255	0.328549	0.561894	0.000639813	0.424509	0.0134155	-0.137385	0.662229	0.117115	0.563038	0.785625	1.57e-06	0.66851	7.78e-05	-0.44478	0.0942925	0.361116	0.26277	0.805895	0.00290083	8.99818	9.28723	9.0407	8.93898	9.79023	9.61897	9.05081	9.16311	9.51334	9.62109	9.69896	9.85198
ILMN_1664440	TP53BP1	-0.0610984	0.997255	-0.372954	0.0122574	0.428181	0.00479096	0.459882	0.00244319	0.354695	0.027663	-0.105187	0.735074	0.148026	0.392933	0.843974	7.26e-08	0.695948	1.06e-05	-0.311856	0.24815	0.489279	0.0466801	0.801135	0.00108537	8.24591	8.25383	8.15323	8.22431	8.73249	8.68702	8.38301	8.29058	8.60515	8.60398	9.06022	9.00528
ILMN_1801504	RUNX1	0.299738	0.96156	-0.281945	0.130447	0.51882	0.00285111	0.419191	0.0190014	0.189008	0.417067	-0.230183	0.399224	-0.162492	0.42116	0.40809	0.0163907	0.570582	0.00147606	-0.581683	0.028521	0.219082	0.632031	0.800765	0.00601637	7.02581	7.10676	7.26272	7.46933	7.53447	7.43648	7.38753	7.01953	7.10641	7.40417	7.83759	7.71064
ILMN_1776516	ITPKA	0.0273418	0.997814	1.47899	1.18932e-13	2.27964	4.65557e-19	0.050636	0.849037	-0.0261203	0.935671	-0.0767563	0.830094	1.50229	5.51649e-14	2.22618	6.59564e-19	0.723888	7.91693e-06	1.45165	4.14903e-09	2.2523	6.40428e-14	0.800644	0.00143058	6.52314	6.60431	6.55455	6.62758	6.62868	6.60004	8.03489	8.15182	6.62114	6.45407	8.83274	8.80174
ILMN_1680104	SLC35C1	-0.159476	0.989008	0.197823	0.307535	0.995649	2.55856e-08	0.29579	0.103758	0.0947996	0.729649	-0.200991	0.460881	0.653089	4.02995e-05	1.24992	6.32279e-11	0.596836	0.000488173	0.357298	0.224003	1.15513	3.30589e-06	0.797827	0.00377195	8.43747	8.48488	8.14453	8.45888	8.71578	8.79815	9.04658	8.863	8.44097	8.67098	9.59721	9.50604
ILMN_2169089	C18orf54	-0.0332712	0.997814	0.380787	0.0220717	1.17768	4.82293e-10	-0.133742	0.558065	0.020792	0.954219	0.154534	0.6134	0.280317	0.093132	1.23175	9.62146e-11	0.951431	1.88569e-07	0.414059	0.138633	1.21096	1.40164e-06	0.796897	0.00385409	6.5864	6.77013	6.65501	6.63497	6.61618	6.47286	6.95494	6.89568	6.76024	6.63788	7.69499	8.05849
ILMN_1749875	LOC728715	-0.134056	0.994666	0.188653	0.30129	0.984613	9.11269e-09	-0.0930875	0.693066	-0.181022	0.380906	-0.0879345	0.802731	0.229622	0.157152	0.937647	1.71365e-08	0.708025	1.57538e-05	0.32271	0.251011	1.11867	2.06459e-06	0.79596	0.00196907	6.79945	6.87943	6.65501	6.75575	6.71494	6.77777	6.98562	6.88439	6.75603	6.5608	7.71498	7.57109
ILMN_1805330	KLHL26	0.0988034	0.995727	0.113172	0.586125	0.908872	4.36538e-08	0.069117	0.78491	0.247905	0.17745	0.178788	0.494316	0.0834852	0.682738	1.05797	8.02156e-10	0.974488	2.88046e-08	0.0143682	0.97853	0.810068	0.000381922	0.7957	0.00173784	6.52314	6.48647	6.64438	6.56284	6.4907	6.65715	6.65811	6.71608	6.7987	6.70673	7.58265	7.74052
ILMN_2169490	TDRD9	0.0306013	0.997814	0.766221	8.57041e-06	1.56175	8.06823e-13	-0.17569	0.426277	-0.0109491	0.977567	0.164741	0.599524	0.559929	0.00058578	1.5202	1.07447e-12	0.960272	3.41749e-07	0.73562	0.00351396	1.53115	2.0905e-08	0.795531	0.00614448	5.60271	5.75665	5.64868	5.77189	5.62819	5.3798	6.36792	6.17251	5.65798	5.67948	7.03662	7.42435
ILMN_1732410	SLC16A9	-0.0595409	0.997255	0.75837	5.86449e-06	1.5517	3.94886e-13	0.400782	0.020216	0.276969	0.156326	-0.123813	0.713224	1.21869	1.38476e-10	1.88821	9.57078e-16	0.669514	0.000108944	0.817911	0.00071373	1.61124	3.19454e-09	0.793327	0.00443549	6.2673	5.92651	6.00329	6.07143	6.45147	6.5439	7.22724	7.28487	6.23352	6.51423	7.97237	7.87877
ILMN_2329914	SPRY1	-0.0591691	0.997255	-0.624865	3.71e-05	0.16824	0.431269	-0.198142	0.281756	-0.102223	0.671989	0.0959192	0.772795	-0.763838	7.17e-07	0.125186	0.528897	0.889024	1.63e-07	-0.565696	0.0141303	0.227409	0.545441	0.793105	0.00166194	8.96173	8.97355	8.9192	8.89774	8.74674	8.79225	8.15932	8.12994	8.97851	8.75233	9.05753	9.00978
ILMN_2405254	GRB7	-0.0213081	0.997814	-1.32109	4.39e-11	-0.528149	0.00195836	0.016889	0.958362	-0.00946569	0.979607	-0.0263547	0.958549	-1.28289	6.15e-11	-0.516307	0.0016048	0.766581	1.74e-05	-1.29978	4.89e-07	-0.506841	0.0797804	0.792936	0.00558697	8.08866	7.97644	8.06493	7.95756	7.86791	8.23097	6.66439	6.79232	8.17339	7.87278	7.49773	7.49214
ILMN_1811364	SGPP2	-0.00381001	0.999277	1.44572	1.88355e-13	2.2323	7.2465e-19	0.507097	0.00099225	0.684643	1.55243e-05	0.177546	0.490406	1.95663	1.93743e-17	2.92075	1.01222e-22	0.964123	2.64275e-08	1.44953	3.82299e-09	2.23611	6.4385e-14	0.786577	0.00169633	6.21164	6.3386	6.29022	6.2524	6.80935	6.75508	8.296	8.15989	6.97103	6.9485	9.15169	9.23244
ILMN_1736015	PHF17	0.137011	0.994666	0.0408147	0.881433	0.824515	8.48292e-07	-0.0729628	0.78245	-0.290792	0.115325	-0.217829	0.389939	-0.169159	0.356035	0.396712	0.0120144	0.565871	0.000726645	-0.0961961	0.822285	0.687504	0.00492075	0.7837	0.00358131	7.2752	7.07248	7.43391	7.1878	7.06446	7.13729	7.11475	7.16863	6.96093	6.80516	7.7796	7.63553
ILMN_1772137	LOC650577	-0.181038	0.986712	-0.0539863	0.845379	0.725148	2.20701e-05	-0.00815985	0.980816	-0.254389	0.218308	-0.246229	0.341427	0.118892	0.575714	0.651797	7.77996e-05	0.532905	0.00255725	0.127052	0.76891	0.906186	0.000299034	0.779134	0.00668265	5.92473	6.2498	6.02394	5.78852	6.08204	6.07617	6.04321	6.00703	5.69266	5.97309	6.6265	6.48955
ILMN_1764629	SLC39A14	-0.00676436	0.999277	1.78055	9.96657e-15	2.55849	2.56601e-19	-0.387524	0.0273373	-0.474879	0.00695866	-0.0873549	0.822758	1.39979	5.26395e-12	2.09038	6.92481e-17	0.690584	8.01379e-05	1.78732	2.86431e-10	2.56526	2.59009e-14	0.777939	0.00624214	7.67067	7.6769	7.74982	7.58422	7.44018	7.13234	8.99423	9.1394	7.21027	7.18755	9.5992	9.91559
ILMN_2364272	MBNL2	0.209798	0.978564	-0.330669	0.0446864	0.446446	0.00619506	-0.334861	0.0495018	-0.106451	0.673817	0.22841	0.354905	-0.875327	1.15e-07	0.130198	0.532334	1.00552	3.22e-08	-0.540466	0.028479	0.236649	0.54954	0.777115	0.00365782	9.19277	9.21527	9.44981	9.37783	8.86523	8.87309	8.36787	8.70911	9.02593	9.16921	9.53697	9.55106
ILMN_1671554	LPIN1	0.13051	0.994666	-0.46156	0.00259247	0.310741	0.0723786	-0.427563	0.00747673	-0.461225	0.0045793	-0.0336621	0.937526	-1.01963	2.36e-09	-0.280994	0.0836891	0.738638	8.37e-06	-0.59207	0.0116154	0.180231	0.671072	0.772301	0.00305812	10.2383	10.354	10.4932	10.3601	9.75675	9.98042	9.41194	9.40211	9.77322	9.89663	10.166	10.1253
ILMN_1752510	FAM13A	0.0851463	0.997255	-1.0567	5.95e-09	-0.284511	0.140581	0.711725	2.82e-05	0.804458	4.1e-06	0.0927329	0.805269	-0.430117	0.00634543	0.4348	0.00697402	0.864917	1.29e-06	-1.14184	3.75e-06	-0.369657	0.260291	0.772185	0.00575791	7.58629	7.36481	7.68145	7.43994	8.27104	8.10351	7.21375	7.04741	8.23673	8.32328	7.89478	8.09621
ILMN_1763228	MEF2D	-0.170942	0.986712	-1.48561	1.07e-12	-0.713976	2.1e-05	0.172311	0.418164	-0.017196	0.962855	-0.189507	0.504558	-1.14236	6.72e-10	-0.56023	0.000478882	0.58213	0.000754437	-1.31467	2.54e-07	-0.543034	0.0469156	0.771637	0.00603196	9.27947	9.56835	9.18219	9.32375	9.64246	9.54998	8.26395	7.95727	9.41471	9.39872	8.74865	8.63682
ILMN_1745034	SLC11A2	0.0471993	0.997814	-1.54575	4.81e-14	-0.777742	1.18e-06	0.292656	0.080805	0.0880988	0.732551	-0.204557	0.404207	-1.3003	3.92e-12	-0.736842	2.05e-06	0.563455	0.000441576	-1.59295	6.08e-10	-0.824941	0.000306528	0.768012	0.0028464	10.8353	10.8653	10.9309	10.864	11.1398	11.146	9.54513	9.64919	10.9834	10.8933	10.0481	10.2732
ILMN_1682015	GAL	0.0905114	0.997255	0.424509	0.00450297	1.19199	4.18153e-11	-0.707768	7.2026e-06	-0.850495	2.50486e-07	-0.142727	0.611463	-0.373771	0.010043	0.250979	0.119102	0.62475	7.94302e-05	0.333998	0.215431	1.10147	1.74564e-06	0.767477	0.00232237	7.77735	7.78673	7.87667	7.86842	7.14577	7.00276	7.5122	7.48536	6.8889	6.97418	8.1894	8.05766
ILMN_1657679	VAV3	-0.129515	0.994666	-3.09331	8.97e-23	-2.32663	6.73e-19	0.614926	0.000130044	0.137451	0.551489	-0.477475	0.00943224	-2.34887	2.42e-19	-2.05966	1.71e-17	0.289212	0.115165	-2.9638	6.58e-17	-2.19711	3.2e-13	0.766687	0.00361562	9.16553	9.10055	9.13205	8.87499	9.81881	9.67712	6.71368	6.59563	9.22949	9.31149	6.97409	6.91364
ILMN_1778523	KLF9	0.0685617	0.997255	0.588503	0.000138154	1.35435	3.36142e-12	0.451009	0.00479036	0.384732	0.0221083	-0.066277	0.864238	0.970951	7.88837e-09	1.67052	6.0862e-15	0.69957	2.17578e-05	0.519942	0.0327927	1.28579	1.40996e-07	0.765847	0.00348626	6.9243	7.06281	7.12968	6.99455	7.40654	7.48258	8.08402	7.98211	7.28711	7.46946	8.8014	8.66387
ILMN_1697448	TXNIP	-0.218603	0.978564	-1.21076	1.04e-10	-0.444972	0.00657369	0.0411457	0.888785	0.413613	0.0151077	0.372467	0.0667207	-0.951011	2.06e-08	0.187244	0.320965	1.13825	2.03e-09	-0.992157	2.64e-05	-0.226369	0.576343	0.765787	0.00443549	10.864	10.8749	10.6012	10.7005	10.9156	10.9056	9.88333	9.51637	11.2674	11.2988	10.8122	10.864
ILMN_3229749	TRIM53	-0.08845	0.997255	-0.0779874	0.732247	0.674892	1.52758e-05	0.0239596	0.934914	0.0426225	0.88764	0.0186629	0.968466	0.0344222	0.882211	0.805964	3.49078e-07	0.771542	2.86562e-06	0.0104626	0.985146	0.763342	0.000855262	0.752879	0.00342229	5.86741	5.84335	5.70735	5.8265	5.9124	5.84627	5.86845	5.73425	5.81138	5.98462	6.54178	6.60401
ILMN_1674193	EMX1	-0.117669	0.994666	0.130397	0.551185	0.881893	3.76016e-07	0.026161	0.933878	-0.0532698	0.86535	-0.0794308	0.838214	0.274227	0.103035	0.946292	5.42363e-08	0.672065	9.55484e-05	0.248066	0.459106	0.999562	4.51769e-05	0.751496	0.00784188	5.85667	6.00516	6.01542	5.61107	5.92027	5.99388	6.06114	6.11381	5.94048	5.81481	6.74488	6.7742
ILMN_1732071	HIST2H2BE	0.060776	0.997255	-0.746742	5.18e-06	-0.00073037	0.998163	-1.26644	1e-10	-1.36393	1.79e-11	-0.0974847	0.786912	-2.07396	2.54e-17	-1.42543	1.41e-12	0.648527	0.000124983	-0.807518	0.000629214	-0.0615064	0.923309	0.746011	0.00686971	9.48087	9.73736	9.68095	9.65883	8.43672	8.24862	7.68178	7.51008	8.33874	8.15163	8.28617	8.20274
ILMN_1734366	RORC	-0.0836564	0.997255	-1.4647	2.05e-12	-0.719185	2.17e-05	0.685196	6.51e-05	0.832876	2.74e-06	0.14768	0.644946	-0.69585	1.92e-05	0.197347	0.316351	0.893197	8.84e-07	-1.38105	1.09e-07	-0.635529	0.0153324	0.745517	0.00965272	7.08886	6.77772	6.76007	6.9392	7.4648	7.77218	6.18148	6.12608	7.80497	7.72736	7.00646	7.0875
ILMN_1811272	GPR81	0.0371677	0.997814	-0.769754	9.84e-07	-0.0257337	0.942203	-0.119518	0.578151	-0.177887	0.383217	-0.0583697	0.879408	-0.92644	1.36e-08	-0.240789	0.143804	0.685651	2.08e-05	-0.806922	0.00030107	-0.0629015	0.914652	0.74402	0.00370191	8.23079	8.31222	8.31937	8.29798	8.14346	8.16052	7.26452	7.49995	8.10247	8.08477	8.05506	8.08071
ILMN_1703531	S1PR3	0.136155	0.994666	-0.356985	0.0220957	0.38649	0.016636	0.0208333	0.943469	0.135778	0.54795	0.114944	0.714501	-0.472307	0.00127463	0.386113	0.0108553	0.858419	4.05e-07	-0.49314	0.0424383	0.250335	0.48985	0.743475	0.0040931	7.12701	7.0778	7.24743	7.22969	7.12132	7.12516	6.89366	6.63885	7.21271	7.26365	7.577	7.67234
ILMN_1765574	TFAP2A	0.0632823	0.997255	-1.85177	1.63e-15	-1.11532	1.66e-09	0.12941	0.572937	0.102297	0.700175	-0.0271135	0.955418	-1.78564	3.01e-15	-1.07631	2.5e-09	0.709333	3.68e-05	-1.91505	3.21e-11	-1.17861	2.15e-06	0.736446	0.00896673	10.72	10.8783	10.869	10.8559	10.9334	10.9237	9.12454	9.02905	10.8524	10.9505	9.59079	9.98147
ILMN_1736093	SNX33	-0.11549	0.994666	0.0060744	0.984489	0.737973	2.69313e-06	0.32386	0.046399	0.0891458	0.72461	-0.234714	0.303491	0.445424	0.00213243	0.942609	1.04103e-08	0.497185	0.00181785	0.121564	0.751099	0.853463	0.000161919	0.731899	0.00432167	7.188	7.1331	7.11613	6.974	7.52315	7.44567	7.57254	7.40843	7.22467	7.27473	7.98192	7.99342
ILMN_3236045	SPINT3	0.0524296	0.997255	0.174694	0.341175	0.90204	4.73361e-08	0.224126	0.210426	0.164536	0.431447	-0.0595898	0.876501	0.34639	0.0194401	1.01415	2.03492e-09	0.667756	3.26544e-05	0.122265	0.750015	0.849611	0.000182657	0.727346	0.00481865	5.8248	6.04429	5.96243	6.01152	6.12022	6.19712	6.37821	6.28852	6.11364	6.08453	6.99751	7.00474
ILMN_1781400	SLC7A2	0.211301	0.978564	-1.92544	2.76e-16	-1.19828	1.55e-10	1.34538	1.55e-11	0.410824	0.0160002	-0.934559	5.51e-07	-0.791354	9.42e-07	-0.998753	8.45e-09	-0.207399	0.324004	-2.13674	8.86e-13	-1.40958	3.06e-08	0.72716	0.00814692	7.16905	7.30931	7.50151	7.39945	8.56566	8.60346	6.58659	6.73166	7.62172	7.67829	6.29802	6.60543
ILMN_1715864	NHS	0.0975139	0.997255	0.942721	5.51476e-08	1.66903	3.29652e-14	-0.49073	0.00310959	-0.451153	0.00854542	0.0395776	0.92881	0.354477	0.0253145	1.12036	8.23614e-10	0.765886	9.67092e-06	0.845208	0.00037809	1.57152	3.90476e-09	0.726309	0.00966671	6.52822	6.87943	6.80978	6.7929	6.21164	6.21455	7.2334	7.07824	6.15624	6.34911	7.92828	7.91513
ILMN_1667295	VASN	-0.00723985	0.999277	-2.13171	6.74e-18	-1.40813	1.15e-12	-0.412576	0.0103928	-0.0265255	0.936538	0.386051	0.0455768	-2.53704	1.88e-20	-1.42741	5.04e-13	1.10963	2.08e-09	-2.12447	5.41e-13	-1.40089	2.05e-08	0.723581	0.00644359	11.0576	11.1296	11.1077	11.065	10.6252	10.7369	8.64577	8.45288	10.9648	11.1694	9.69392	9.624
ILMN_1670672	TMEM37	-0.170901	0.986712	0.0702847	0.771537	0.790359	1.55687e-06	0.254777	0.157632	0.0721094	0.797972	-0.182667	0.500444	0.495963	0.00100662	1.03337	3.07155e-09	0.537407	0.00118062	0.241186	0.453449	0.961261	4.53395e-05	0.720075	0.0081619	6.06419	6.01691	5.92493	5.81437	6.15271	6.43795	6.37821	6.35301	6.15843	6.06688	6.98609	6.81994
ILMN_1664176	FBLN5	0.123775	0.994666	-0.08808	0.708213	0.630079	0.000106315	-0.0258656	0.933201	-0.0629942	0.832366	-0.0371286	0.933332	-0.23772	0.16087	0.44331	0.00485649	0.68103	5.72e-05	-0.211855	0.538399	0.506304	0.0621561	0.718159	0.00995152	6.42192	6.38082	6.3511	6.69918	6.36429	6.38671	6.34675	6.22809	6.33228	6.34447	6.87964	7.05726
ILMN_1789400	FOXD2	-0.119066	0.994666	-1.10288	9.37e-10	-0.3875	0.0210127	0.440098	0.00709059	0.169023	0.440004	-0.271075	0.23736	-0.543717	0.000348245	-0.0994114	0.658839	0.444305	0.00845858	-0.983815	2.87e-05	-0.268434	0.462776	0.71538	0.00906346	8.1401	8.13522	8.08506	7.95213	8.52851	8.627	7.45542	7.49433	8.14061	8.47276	7.93869	7.89967
ILMN_1667115	TMEM61	-0.0506778	0.997255	0.238525	0.153415	0.953003	1.23559e-08	0.0293925	0.9193	-0.259766	0.145089	-0.289158	0.166634	0.318595	0.0322246	0.743915	1.39103e-06	0.425319	0.00826841	0.289203	0.310643	1.00368	1.0749e-05	0.714478	0.00557724	6.1216	6.21164	6.13502	6.09687	6.20774	6.18428	6.35051	6.51856	5.8748	5.93891	6.91493	6.80479
ILMN_1708798	EAF2	-0.32146	0.960939	0.897993	8.90789e-08	1.6024	4.58844e-14	-0.0277495	0.926693	0.0625875	0.829993	0.0903371	0.802302	1.1917	7.94986e-11	1.98645	6.11187e-17	0.794743	2.9856e-06	1.21945	4.88736e-07	1.92386	1.30337e-11	0.704406	0.00995152	6.41658	6.37054	6.10318	6.04102	6.36923	6.36239	7.29241	7.2352	6.63062	6.28168	8.06113	8.05596
ILMN_1764850	HPCAL1	0.170933	0.984604	0.617656	4.16756e-05	1.30148	4.19512e-12	-0.0500053	0.850497	-0.16803	0.413298	-0.118025	0.698602	0.396718	0.00616943	0.962517	5.71343e-09	0.5658	0.000341275	0.446723	0.0676022	1.13055	1.08965e-06	0.683824	0.00873913	9.89161	9.85684	9.95516	10.1352	9.88243	9.76601	10.4634	10.4204	9.70692	9.70547	11.0031	11.0122
ILMN_1771728	PXMP4	0.0227236	0.997814	1.04611	4.40782e-09	1.64359	3.64077e-14	-0.313856	0.0727079	0.0544245	0.85764	0.368281	0.0742888	0.709526	7.59105e-06	1.67529	1.28914e-14	0.965767	9.4004e-08	1.02338	1.79742e-05	1.62087	1.48878e-09	0.597486	0.0457814	9.78675	9.94866	9.92762	9.85324	9.47442	9.63328	10.7287	10.4712	9.86586	9.97841	11.6494	11.4821

## Sheet: LI KR > WT
Probe ID	Gene Name	(null +ligand) vs (null –ligand) Expression	B-H p-value	(WT +ligand) vs (WT –ligand) Expression	B-H p-value	(KR +ligand) vs (KR –ligand) Expression	B-H p-value	(WT –ligand) vs (null –ligand) Expression	B-H p-value	(KR –ligand) vs (null –ligand) Expression	B-H p-value	(KR –ligand) vs (WT –ligand) Expression	B-H p-value	(WT +ligand) vs (null +ligand) Expression	B-H p-value	(KR +ligand) vs (null +ligand) Expression	B-H p-value	(KR +ligand) vs (WT +ligand) Expression	B-H p-value	[(WT +ligand) vs (WT –ligand)] vs [(null +ligand) vs (null –ligand)]	B-H p-value	[(KR +ligand) vs (KR –ligand)] vs [(null +ligand) vs (null –ligand)]	B-H p-value	[(KR +ligand) vs (KR –ligand)] vs [(WT +ligand) vs (WT –ligand)]	B-H p-value	null –ligand replicate1	null –ligand replicate2	null +ligand replicate1	null +ligand replicate2	WT –ligand replicate1	WT –ligand replicate2	WT +ligand replicate1	WT +ligand replicate2	KR –ligand replicate1	KR –ligand replicate2	KR +ligand replicate1	KR +ligand replicate2
ILMN_2176592	BCHE	0.0225437	0.997814	-0.0277425	0.921341	-0.422922	0.00765385	-5.49386	2.24977e-31	-0.323997	0.058846	5.16986	4.17337e-30	-5.54414	1.07373e-31	-0.769463	9.80134e-07	4.77468	7.63771e-29	-0.0502862	0.9154	-0.445466	0.0982862	-0.39518	0.281946	11.3206	11.4003	11.4026	11.3634	5.90099	5.83221	5.86205	5.81567	11.0562	11.0168	10.4849	10.7422
ILMN_1791270	CDH10	-0.0366615	0.997814	-0.144655	0.507399	-1.3783	1.35756e-11	-6.58572	1.19444e-32	-2.45935	1.64822e-18	4.12638	1.01886e-25	-6.69372	6.56682e-33	-3.80099	5.34941e-25	2.89273	3.1781e-20	-0.107993	0.806921	-1.34164	2.50712e-07	-1.23365	8.52655e-06	12.5494	12.5056	12.6747	12.307	5.96322	5.92037	5.71915	5.87513	10.0194	10.117	8.8265	8.55323
ILMN_1706176	GNAT3	-0.042957	0.997814	-0.556165	0.00116936	-0.847274	2.57e-06	1.03754	6.77e-08	2.94522	2.94e-20	1.90769	7.82e-14	0.524328	0.00158455	2.14091	1.11e-16	1.61658	3.38e-12	-0.513208	0.0682306	-0.804317	0.0022021	-0.291109	0.598784	5.78699	5.5585	5.68534	5.57424	6.96623	6.45434	6.13073	6.1775	8.60346	8.63248	7.72513	7.81626
ILMN_1801584	CXCR4	0.0674808	0.997255	1.05808	7.30725e-09	-0.760581	8.03628e-06	-1.46714	4.57604e-12	0.337848	0.0706813	1.80499	9.05252e-14	-0.476542	0.00266729	-0.490214	0.00244032	-0.0136722	0.974249	0.990598	5.27504e-05	-0.828062	0.000867031	-1.81866	2.66201e-09	8.99305	9.1378	9.16963	9.09618	7.55456	7.64201	8.47266	8.84007	9.41471	9.39183	8.51513	8.77025
ILMN_2189027	LIPG	0.153399	0.990485	0.0467026	0.86712	-1.29672	4.1342e-11	-2.66167	6.38749e-20	-0.917893	2.94809e-07	1.74378	1.57157e-13	-2.76837	6.69303e-21	-2.36802	1.04417e-18	0.400352	0.0246675	-0.106696	0.804796	-1.45012	3.03661e-08	-1.34343	1.15874e-06	9.28912	9.49474	9.5508	9.53986	6.61784	6.84268	6.72667	6.82725	8.5902	8.35787	7.28895	7.06568
ILMN_1805665	FLRT3	0.0101923	0.999277	-0.0829816	0.713836	-0.970473	1.17386e-08	-0.992741	1.16998e-08	0.712174	1.12627e-05	1.70492	7.17892e-14	-1.08592	4.39263e-10	-0.268492	0.0989916	0.817424	1.09475e-06	-0.0931739	0.821534	-0.980665	2.13496e-05	-0.887492	0.000432145	10.2666	10.3105	10.2938	10.3036	9.31958	9.27201	9.21915	9.20647	11.1362	10.8653	10.0685	9.99201
ILMN_2380967	DNASE1L1	-0.00382463	0.999277	-0.158185	0.476351	-0.142076	0.602299	-0.859977	2.66374e-06	0.556356	0.0020638	1.41633	2.44369e-10	-1.01434	3.15296e-08	0.418104	0.0150451	1.43244	5.85994e-11	-0.154361	0.713297	-0.138251	0.802865	0.0161093	0.988392	9.52048	9.43769	9.6177	9.33282	8.38946	8.84875	8.40554	8.5163	10.0024	10.0685	9.95095	9.83578
ILMN_2366642	VCX3A	0.0559992	0.997255	-0.247752	0.139136	-0.0582441	0.851723	-1.05895	2.3555e-09	0.230382	0.221695	1.28933	1.36144e-10	-1.3627	1.07811e-12	0.116138	0.571815	1.47884	1.29578e-12	-0.303752	0.285115	-0.114243	0.820566	0.189508	0.739492	10.8148	10.9114	10.9875	10.8508	9.90389	9.70444	9.52961	9.58321	11.1095	11.0775	11.0537	11.0168
ILMN_2340259	PDE4B	0.170453	0.986712	0.0785216	0.733728	-1.13157	3.03043e-10	-0.499607	0.00156219	0.789316	1.86947e-06	1.28892	1.70552e-10	-0.591539	7.65366e-05	-0.512711	0.000648083	0.0788274	0.778751	-0.0919313	0.825017	-1.30203	9.20236e-08	-1.2101	2.60747e-06	5.89938	6.00291	6.07654	6.16666	5.51264	5.39044	5.51238	5.54775	6.67727	6.80366	5.70965	5.50813
ILMN_1804277	SPRED1	0.0821482	0.997255	0.545429	0.000372601	-0.820486	5.37688e-07	-0.527719	0.000888952	0.752362	5.0137e-06	1.28008	2.13087e-10	-0.0644376	0.76948	-0.150272	0.441741	-0.0858348	0.755427	0.463281	0.0648554	-0.902634	9.5503e-05	-1.36592	2.67152e-07	8.24285	8.48822	8.52688	8.36849	7.82069	7.85494	8.33521	8.43128	9.15135	9.08445	8.28159	8.31323
ILMN_2316236	HOPX	0.0628703	0.997255	-0.285108	0.080984	-0.266641	0.140018	-1.59935	4.63068e-14	-0.333067	0.0504568	1.26628	2.13087e-10	-1.94733	4.08325e-17	-0.662578	1.46379e-05	1.28475	4.55104e-11	-0.347979	0.201489	-0.329511	0.296096	0.0184676	0.985931	9.13548	8.9127	9.05834	9.11558	7.34751	7.50198	7.13045	7.14882	8.65996	8.72209	8.44039	8.40838
ILMN_1684886	VCX	-0.0182627	0.997814	-0.337711	0.0285408	-0.029585	0.931488	-1.0591	1.67769e-09	0.118596	0.605628	1.17769	8.26599e-10	-1.37855	5.34727e-13	0.107274	0.602107	1.48582	7.99348e-13	-0.319448	0.24374	-0.0113223	0.98683	0.308126	0.464674	10.569	10.6413	10.5872	10.5865	9.4536	9.63846	9.21145	9.20519	10.7184	10.729	10.7387	10.6496
ILMN_1679133	SERPINB1	0.0990688	0.997255	-0.0699407	0.779971	-0.22345	0.286465	0.149349	0.494888	1.3096	6.24264e-11	1.16025	6.03793e-09	-0.0196606	0.939724	0.987083	1.68063e-08	1.00674	5.00167e-08	-0.169009	0.652255	-0.322518	0.353588	-0.153509	0.82241	5.7009	5.62698	5.87971	5.64629	5.85688	5.76969	5.59701	5.88968	6.97452	6.97256	6.84326	6.65691
ILMN_1779241	CRYM	0.225568	0.978564	0.571548	0.000275833	0.190867	0.38154	0.33767	0.0479446	1.42734	3.9449e-12	1.08967	1.73401e-08	0.68365	1.24704e-05	1.39264	1.82563e-12	0.708989	2.51165e-05	0.345981	0.227428	-0.0347006	0.961476	-0.380681	0.339498	5.73718	5.50363	5.82247	5.86947	5.82968	6.08647	6.58354	6.4757	7.00028	7.0952	7.20458	7.27263
ILMN_2166716	VCX-C	-0.131419	0.994666	-0.214258	0.230167	-0.0270746	0.940458	-1.01008	1.06732e-08	-0.0226574	0.947775	0.987419	1.07978e-07	-1.09292	5.1973e-10	0.081687	0.725064	1.1746	5.9302e-10	-0.0828392	0.847119	0.104344	0.843879	0.187184	0.751559	10.809	10.772	10.6048	10.7134	9.65283	9.908	9.56605	9.56627	10.8205	10.7152	10.6719	10.8096
ILMN_1670870	ALCAM	-0.0145526	0.999277	0.116417	0.635017	0.355865	0.0665639	1.06588	4.28e-08	2.03734	2.5e-15	0.971459	1.61e-06	1.19685	9.25e-10	2.40776	4.63e-18	1.21091	4.22e-09	0.130969	0.771973	0.370417	0.305266	0.239448	0.702741	8.40225	8.12772	8.28406	8.21681	9.13622	9.52552	9.43183	9.46274	10.4058	10.1988	10.5197	10.7966
ILMN_3305614	ZNF812	-0.00418068	0.999277	1.99681	6.47917e-17	3.40809	7.41915e-24	0.200179	0.299003	1.15581	6.76945e-10	0.955627	2.72559e-07	2.20117	2.09769e-18	4.56808	4.71731e-28	2.36691	3.38665e-18	2.00099	3.90039e-12	3.41227	1.70639e-18	1.41129	2.01822e-07	5.85814	6.11451	5.95276	6.01152	6.1398	6.2332	8.25761	8.10901	7.15923	7.12503	10.4665	10.6339
ILMN_1704154	TNFRSF19	0.101258	0.994666	-0.184845	0.303343	-0.918031	2.9505e-08	0.318577	0.0509619	1.26396	2.71569e-11	0.945385	1.4813e-07	0.0324731	0.888881	0.244672	0.134329	0.212199	0.278872	-0.286104	0.318864	-1.01929	8.40999e-06	-0.733186	0.00421912	6.84384	6.93768	6.99568	6.98836	7.18903	7.22965	6.99596	7.05302	8.07151	8.23793	7.17155	7.30183
ILMN_1667169	LOC440349	-0.05387	0.997814	-0.0292192	0.922964	-0.273156	0.167604	-1.22962	3.87021e-10	-0.293363	0.126907	0.936254	1.04912e-06	-1.20497	1.89516e-10	-0.512649	0.00141711	0.692317	6.71554e-05	0.0246508	0.963578	-0.219286	0.612467	-0.243937	0.668008	7.63138	7.29313	7.52927	7.2875	6.27587	6.18941	6.23433	6.17251	7.09635	7.24144	6.96295	6.82853
ILMN_2396020	DUSP6	-0.0162694	0.998475	0.042129	0.877992	0.0337894	0.926618	-1.62193	1.23036e-13	-0.693703	3.9076e-05	0.928228	8.05409e-07	-1.56353	1.06121e-13	-0.643645	5.04001e-05	0.919888	2.72979e-07	0.0583984	0.904565	0.0500588	0.941192	-0.00833954	0.994449	8.2829	8.01046	7.99081	8.27001	6.53329	6.5162	6.51555	6.6182	7.47567	7.43028	7.53577	7.43776
ILMN_3236667	GAGE12D	-0.107175	0.997255	-0.405857	0.0232379	-0.119235	0.688234	-0.712175	8.31415e-05	0.20893	0.37304	0.921105	4.97309e-06	-1.01086	4.70798e-08	0.19687	0.352651	1.20773	5.01324e-09	-0.298682	0.384126	-0.0120599	0.987843	0.286622	0.613855	9.35208	8.94831	9.00692	9.07911	8.45063	8.42541	8.21174	7.85258	9.40761	9.31063	9.12014	9.35964
ILMN_1713008	ABCC11	0.141707	0.994666	0.245045	0.177844	-0.17374	0.456127	-1.63648	1.23036e-13	-0.724818	2.21521e-05	0.911664	1.37695e-06	-1.53314	2.37595e-13	-1.04026	5.43353e-09	0.492879	0.00411553	0.103339	0.811016	-0.315446	0.372111	-0.418785	0.281946	8.92708	8.78758	8.99182	9.00625	7.10702	7.33468	7.39816	7.53363	8.19745	8.06757	7.81159	8.10596
ILMN_2297765	KCNMA1	0.181115	0.981105	0.58823	0.000182658	0.430134	0.00882444	0.799686	2.05e-06	1.70611	2.88e-14	0.906426	9.38e-07	1.2068	6.72e-11	1.95513	1.11e-16	0.748331	9.92e-06	0.407114	0.130598	0.249019	0.515714	-0.158095	0.806767	5.66796	5.89676	5.92236	6.0046	6.65381	6.51028	7.27744	7.06312	7.42344	7.55351	7.90728	7.92993
ILMN_2374159	HERPUD1	-0.0669789	0.997255	-0.744746	5.00845e-06	-0.471368	0.00404523	-0.488229	0.00294791	0.399704	0.0207701	0.887933	1.73061e-06	-1.166	2.10936e-10	-0.00468538	0.987509	1.16131	1.54589e-09	-0.677767	0.00446739	-0.404389	0.181904	0.273378	0.589486	9.78443	9.88369	9.947	9.58716	9.32255	9.36911	8.5711	8.63106	10.2743	10.1932	9.70692	9.81787
ILMN_1731433	ABP1	-0.0096706	0.999277	0.0594315	0.824869	0.148946	0.560628	-0.215359	0.290068	0.659282	0.000149653	0.874641	4.97309e-06	-0.146257	0.46788	0.817899	1.49523e-06	0.964156	2.17712e-07	0.0691021	0.888697	0.158617	0.75165	0.0895149	0.916788	6.17916	6.37054	6.27135	6.25901	6.17733	5.94165	5.95547	6.28237	6.95967	6.90859	7.19198	6.97418
ILMN_1674620	SGCE	0.0819659	0.997255	-0.128905	0.538293	-0.0257355	0.943851	-0.0282803	0.925996	0.838484	8.76601e-07	0.866764	2.02721e-06	-0.239151	0.147989	0.730782	4.18049e-06	0.969933	6.08326e-08	-0.210871	0.532097	-0.107701	0.839507	0.103169	0.893041	6.35095	6.45119	6.38456	6.58152	6.34697	6.39861	6.18578	6.30199	7.36635	7.11276	7.24232	7.18532
ILMN_1672350	JAM2	-0.0926659	0.997255	-0.0579695	0.823489	-0.380191	0.0281199	-0.326821	0.0627312	0.538888	0.00138084	0.865709	3.3979e-06	-0.292124	0.0739974	0.251363	0.153796	0.543487	0.00138628	0.0346964	0.945682	-0.287526	0.430737	-0.322222	0.484341	6.81428	6.56309	6.66889	6.52314	6.24149	6.48224	6.30016	6.30763	7.15499	7.30015	6.91721	6.77755
ILMN_2394287	ATP6V0A4	-0.077504	0.997255	-0.902613	4.26e-07	-0.738246	2.21e-05	0.52198	0.00284921	1.36911	7.44e-11	0.847132	1.35e-05	-0.303129	0.0799776	0.70837	2.81e-05	1.0115	1.34e-07	-0.825109	0.00101054	-0.660742	0.0138431	0.164367	0.816342	6.65268	6.95373	6.76455	6.68685	7.1577	7.49267	6.5143	6.33085	8.16001	8.18462	7.31531	7.55284
ILMN_2104486	GAGE8	-0.280902	0.966119	-0.279483	0.110443	-0.110947	0.683961	-0.667956	6.54328e-05	0.168597	0.456383	0.836552	6.41542e-06	-0.666536	2.5678e-05	0.338551	0.0404021	1.00509	5.09845e-08	0.00141917	0.998103	0.169954	0.715912	0.168535	0.796637	10.9633	10.6138	10.5126	10.5027	10.0887	10.1525	9.94232	9.73988	11.0143	10.9	10.8063	10.8861
ILMN_1703852	EFNB2	0.255782	0.978564	-2.45895	4.04282e-18	-2.03305	1.29584e-15	-0.354926	0.0640045	0.468764	0.0126907	0.82369	3.62793e-05	-3.06965	3.22724e-21	-1.82007	1.87293e-14	1.24959	2.5736e-09	-2.71473	2.28194e-14	-2.28883	2.88963e-12	0.425898	0.332381	10.1433	9.77245	10.2846	10.1427	9.61237	9.59353	7.0391	7.2489	10.4738	10.3795	8.59656	8.19062
ILMN_2384857	DHRS2	-0.0283818	0.997814	0.0831317	0.739412	0.104107	0.718682	-0.752337	1.42841e-05	0.0697085	0.819032	0.822045	1.42032e-05	-0.640823	7.10504e-05	0.202198	0.302343	0.843021	2.71985e-06	0.111513	0.79891	0.132489	0.804113	0.0209756	0.985494	7.01201	6.90615	7.02728	6.83412	6.00778	6.4057	6.37388	6.20587	7.02998	7.0276	7.09257	7.17322
ILMN_2140510	KLHL13	-0.154019	0.990485	-0.0729697	0.770456	-0.233265	0.260827	-0.543526	0.00111477	0.277709	0.149155	0.821236	1.02768e-05	-0.462477	0.00304683	0.198463	0.301269	0.66094	0.000113622	0.0810494	0.860686	-0.0792461	0.894535	-0.160295	0.810324	7.73277	7.50135	7.59625	7.32983	7.08107	7.06599	7.05243	6.94869	7.84013	7.94941	7.54813	7.77487
ILMN_1739238	L1CAM	-0.0412214	0.997814	-0.160769	0.39816	-0.412489	0.00976981	-1.70562	8.0339e-15	-0.887624	1.61517e-07	0.817992	3.84231e-06	-1.82516	2.89883e-16	-1.25889	1.14259e-11	0.566273	0.000443641	-0.119548	0.76093	-0.371267	0.211061	-0.251719	0.612366	8.70835	8.66387	8.56566	8.72411	6.9913	6.96969	6.84881	6.79064	7.73564	7.86133	7.28814	7.48385
ILMN_1713496	ST3GAL5	-0.0887337	0.997255	0.0626471	0.794711	-0.269145	0.135377	-0.48491	0.00203832	0.329928	0.0535949	0.814838	4.03024e-06	-0.333529	0.0267338	0.149517	0.439126	0.483046	0.00285016	0.151381	0.677287	-0.180411	0.668658	-0.331792	0.425474	6.79524	6.99596	6.78711	6.82662	6.38628	6.43509	6.40613	6.54054	7.29851	7.15254	6.96218	6.95058
ILMN_1785413	ATP2C2	0.0806818	0.997255	0.0515437	0.844237	-0.293175	0.109446	-0.522533	0.00131802	0.280962	0.130202	0.803494	9.77643e-06	-0.551671	0.000306134	-0.0928949	0.686776	0.458776	0.00660689	-0.0291381	0.954285	-0.373857	0.230321	-0.344718	0.424143	7.80929	7.66198	7.80064	7.83198	7.16113	7.26507	7.19312	7.33616	8.16939	7.8638	7.70326	7.74357
ILMN_2178587	ANKRD6	-0.12153	0.994666	-0.220141	0.202936	-0.510618	0.000941498	-0.371608	0.0203031	0.427341	0.00826665	0.798949	5.13436e-06	-0.470219	0.00128795	0.0382529	0.882668	0.508472	0.00154734	-0.0986111	0.807624	-0.389088	0.175862	-0.290477	0.517568	7.78746	7.64583	7.60846	7.58177	7.28325	7.40683	7.17986	7.06994	8.21373	8.07424	7.59678	7.66996
ILMN_1739521	NLGN1	0.0758299	0.997255	-0.304014	0.070808	-0.192085	0.377875	0.0163857	0.957415	0.81362	1.86947e-06	0.797234	1.12557e-05	-0.363459	0.018943	0.545705	0.000434771	0.909163	2.68956e-07	-0.379844	0.17085	-0.267915	0.466965	0.111929	0.88407	7.80438	7.52094	7.75859	7.71839	7.67399	7.6841	7.26139	7.48867	8.42113	8.53142	8.25389	8.3145
ILMN_1748323	CXCL14	0.0433793	0.997814	-0.0200718	0.947803	-0.0857509	0.780446	0.208214	0.308522	0.997984	7.00247e-08	0.78977	2.79388e-05	0.144763	0.471378	0.868854	4.2779e-07	0.72409	3.68484e-05	-0.0634511	0.898711	-0.12913	0.810341	-0.065679	0.944106	5.90381	5.96012	5.84523	6.10545	6.07116	6.20919	6.21423	6.02598	6.9188	6.94109	6.67503	7.01336
ILMN_3251587	LOC100008589	-0.373655	0.960939	0.34035	0.0468485	-0.241662	0.244303	0.115816	0.631187	0.904881	4.43935e-07	0.789064	2.39746e-05	0.829822	7.20386e-07	1.03687	7.747e-09	0.207052	0.347541	0.714005	0.00342717	0.131993	0.802256	-0.582012	0.064479	12.6986	12.5342	12.067	12.4184	12.7421	12.7223	13.019	13.1261	13.4477	13.5949	13.1865	13.3727
ILMN_1724686	CLDN1	-0.0215488	0.997814	-1.2206	3.31026e-09	-1.18423	8.24431e-09	-2.32565	1.79352e-16	-1.54692	2.3967e-11	0.778734	0.000187466	-3.5247	1.80614e-22	-2.7096	6.88574e-19	0.815097	2.99517e-05	-1.19905	1.35429e-05	-1.16268	2.65737e-05	0.0363629	0.976476	10.9551	11.2898	11.023	11.1789	8.71578	8.87787	7.31029	7.84217	9.49898	9.65214	8.46716	8.3155
ILMN_1720511	LRRN1	-0.0191859	0.997814	0.053357	0.839892	-0.333361	0.0607349	-0.772861	4.91832e-06	-0.00119226	0.997525	0.771668	2.37405e-05	-0.700318	1.00527e-05	-0.315367	0.0572326	0.384951	0.0285174	0.0725429	0.875726	-0.314175	0.367023	-0.386718	0.336624	8.47702	8.59386	8.45973	8.57278	7.71839	7.80677	7.74327	7.88861	8.39484	8.67365	8.1038	8.29798
ILMN_1773561	RAP2C	-0.0333549	0.997814	-1.01392	6.52137e-09	-0.414723	0.0119176	0.578716	0.000352971	1.34791	1.53677e-11	0.769193	1.85095e-05	-0.401852	0.00829827	0.966541	1.52499e-08	1.36839	2.01628e-11	-0.980568	2.90447e-05	-0.381368	0.211484	0.5992	0.0413669	10.5582	10.4197	10.525	10.3862	11.0245	11.1108	10.0423	10.0652	11.9511	11.7226	11.3242	11.52
ILMN_1753312	PLXDC2	0.0370455	0.997814	-0.313175	0.0494897	-0.0295742	0.93273	-1.70717	7.18368e-15	-0.938786	4.30015e-08	0.768385	1.0768e-05	-2.05739	6.9152e-18	-1.00541	2.85625e-09	1.05199	5.01324e-09	-0.350221	0.194734	-0.0666197	0.9082	0.283601	0.53687	7.92798	7.97091	8.00028	7.9727	6.19648	6.28807	5.97339	5.88481	6.92217	7.09915	7.05939	6.90278
ILMN_1758523	ABCA3	-0.141066	0.994666	-0.1683	0.39165	-0.298037	0.102265	0.0892064	0.718696	0.857361	6.76663e-07	0.768155	2.18304e-05	0.0619725	0.785774	0.700391	1.06045e-05	0.638418	0.000134026	-0.0272339	0.957112	-0.15697	0.740417	-0.129736	0.85434	8.09407	8.10966	7.94298	7.97862	8.31399	8.06815	8.08402	7.96153	8.92456	8.99389	8.52891	8.79347
ILMN_1780170	APOD	-0.0208014	0.997814	-0.372746	0.0126688	0.132387	0.561444	3.05679	4.72e-23	3.8213	7.77e-26	0.764517	6.94e-06	2.70484	8.16e-22	3.97449	3.74e-27	1.26965	2.76e-11	-0.351945	0.17615	0.153189	0.723403	0.505133	0.0844818	7.98504	7.9667	7.98863	7.9215	11.0234	11.0419	10.6726	10.6472	11.8658	11.7285	11.9391	11.9201
ILMN_1698666	CST6	-0.104192	0.997255	-0.024765	0.936393	-0.254587	0.221326	-2.99195	3.41793e-21	-2.22894	4.80481e-17	0.763014	5.56913e-05	-2.91253	3.22724e-21	-2.37934	1.84675e-18	0.533191	0.00251378	0.079427	0.868113	-0.150395	0.768784	-0.229822	0.702741	8.53454	8.81917	8.57823	8.56709	5.60739	5.76241	5.51553	5.80474	6.36195	6.53388	6.2919	6.09476
ILMN_1796349	SMPDL3A	0.041755	0.997814	0.128754	0.520218	0.0012132	0.997577	0.176763	0.35499	0.932423	4.3842e-08	0.755659	1.33373e-05	0.263762	0.0885593	0.891881	3.83594e-08	0.628119	8.52358e-05	0.0869989	0.833155	-0.0405418	0.951879	-0.127541	0.849385	7.66042	7.61949	7.68523	7.6782	7.76895	7.86449	7.89134	7.9996	8.60687	8.53789	8.66995	8.47724
ILMN_1801216	S100P	0.0988971	0.997255	1.08925	2.46214e-09	1.20018	2.64915e-10	-0.0988911	0.690409	0.647558	0.000134858	0.746449	5.03593e-05	0.891462	1.35243e-07	1.74884	6.0491e-15	0.857381	1.31446e-06	0.990354	3.92619e-05	1.10129	7.47046e-06	0.110932	0.888041	10.3283	9.96129	10.1541	10.3333	10.0294	10.0624	11.1819	11.0883	10.7281	10.8566	11.9682	12.0168
ILMN_1685703	ACOX2	0.00519244	0.999277	0.38616	0.0263896	-0.169984	0.497573	-1.13628	5.82078e-09	-0.390903	0.0363345	0.745373	0.000107317	-0.755308	7.37358e-06	-0.566079	0.000642692	0.189229	0.429203	0.380968	0.209819	-0.175176	0.723939	-0.556144	0.105344	7.45962	7.62287	7.52299	7.56989	6.51436	6.29558	6.57183	7.01044	7.20425	7.09643	7.03662	6.9241
ILMN_1766054	ABCA1	-0.024324	0.997814	0.506251	0.000750897	0.0658813	0.824322	0.0952214	0.679724	0.836943	4.43935e-07	0.741722	1.82047e-05	0.625796	2.58407e-05	0.927148	1.66353e-08	0.301352	0.0850495	0.530574	0.0242525	0.0902053	0.865891	-0.440369	0.18823	8.20878	8.34345	8.32565	8.17794	8.44418	8.2985	8.8851	8.87008	9.14765	9.07847	9.18507	9.17281
ILMN_1774110	CHN2	0.118095	0.994666	1.06688	4.74362e-09	1.68327	3.61765e-14	-0.276773	0.135635	0.46273	0.00765389	0.739503	6.65432e-05	0.672007	2.72264e-05	2.0279	1.03359e-16	1.3559	6.05303e-11	0.94878	8.54443e-05	1.56517	5.78468e-09	0.616392	0.0438338	6.8879	6.79005	6.79718	7.11696	6.6893	6.43509	7.70164	7.55651	7.28302	7.32039	8.92923	9.0407
ILMN_1808508	KITLG	-0.00435595	0.999277	-0.133117	0.522938	-0.259896	0.17229	0.0292156	0.923502	0.76856	4.86621e-06	0.739345	3.60321e-05	-0.0995452	0.627607	0.51302	0.000866351	0.612566	0.000221424	-0.128761	0.746141	-0.25554	0.496815	-0.126779	0.858198	6.6114	6.57774	6.66594	6.51449	6.48895	6.75863	6.49823	6.48311	7.33728	7.38898	7.20173	7.00474
ILMN_1761941	C4orf18	0.187783	0.978564	0.509765	0.000595526	0.396232	0.0115213	-0.418008	0.0070994	0.320023	0.0564826	0.738031	1.62993e-05	-0.0960266	0.621681	0.528472	0.00032038	0.624499	7.9449e-05	0.321982	0.237706	0.208449	0.59034	-0.113532	0.8721	6.61538	6.51047	6.75029	6.75114	6.21367	6.07617	6.69117	6.6182	6.93332	6.83259	7.27489	7.28348
ILMN_1709257	DSCR6	-0.0489188	0.997814	-0.048243	0.877979	0.239483	0.326214	0.473491	0.0134493	1.19585	1.2326e-08	0.722357	0.000554725	0.474167	0.00745941	1.48425	1.68411e-11	1.01008	5.94351e-07	0.000675765	0.999159	0.288402	0.517741	0.287726	0.636388	6.941	7.08302	6.71057	7.21561	7.55051	7.42049	7.44877	7.42574	8.42708	7.98863	8.43733	8.45735
ILMN_1759818	SORL1	-0.0838439	0.997255	0.169632	0.448395	-0.33015	0.103217	-0.878451	2.68972e-06	-0.159455	0.536924	0.718995	0.000336678	-0.624974	0.000238321	-0.405762	0.0218756	0.219212	0.357325	0.253476	0.492015	-0.246306	0.588094	-0.499783	0.205992	10.4613	10.8096	10.7194	10.3838	9.83893	9.67507	9.83697	10.0163	10.6172	10.3348	10.0995	10.1922
ILMN_2230016	HIGD1A	0.0344746	0.997814	-0.0355778	0.915298	-0.133836	0.659384	-0.530273	0.00516507	0.187895	0.46949	0.718168	0.000604854	-0.600326	0.000666649	0.0195839	0.952376	0.619909	0.00136642	-0.0700524	0.899267	-0.168311	0.763912	-0.0982586	0.917383	10.1189	9.69392	10.0128	9.86895	9.38034	9.37196	9.50461	9.17654	10.2476	9.94106	10.105	9.81595
ILMN_1677607	SC5DL	0.00139559	0.999328	-0.0525664	0.844746	-0.331765	0.0660441	-0.561498	0.000742487	0.143919	0.548007	0.705417	0.000122925	-0.615461	9.10388e-05	-0.189242	0.328416	0.426219	0.0148576	-0.053962	0.913658	-0.333161	0.331881	-0.279198	0.585032	12.045	11.9212	11.9115	12.0575	11.4017	11.4415	11.2917	11.4464	12.0136	12.2405	11.6544	11.9361
ILMN_1678816	GREM2	-0.168645	0.984604	-0.0207325	0.939721	-0.589899	9.102e-05	-0.13886	0.486961	0.565247	0.00026211	0.704107	2.99437e-05	0.00905263	0.970872	0.143993	0.442327	0.13494	0.547907	0.147913	0.673727	-0.421254	0.111224	-0.569166	0.0383783	6.04975	6.04429	5.84523	5.91152	5.94828	5.86804	5.88032	5.89454	6.60048	6.62406	5.96127	6.08347
ILMN_3178302	FNDC3B	0.146291	0.990485	0.6706	1.50216e-05	0.472729	0.00250929	-1.2701	2.84977e-11	-0.5695	0.000364474	0.700602	5.52237e-05	-0.745793	1.48774e-06	-0.243061	0.144657	0.502731	0.00186507	0.52431	0.0283591	0.326439	0.304127	-0.197871	0.725798	10.0513	9.93061	10.0373	10.2372	8.67576	8.76598	9.38644	9.3965	9.39333	9.44961	9.82711	9.96129
ILMN_1738712	GPR180	-0.00595314	0.999277	0.0288908	0.920885	-0.212363	0.308547	-1.03944	9.0677e-09	-0.339176	0.0556037	0.700261	9.8788e-05	-1.00459	6.00391e-09	-0.545586	0.000432925	0.459006	0.00655414	0.034844	0.945511	-0.20641	0.626344	-0.241254	0.652949	8.98593	9.00472	8.98958	8.98917	8.03875	7.87304	7.91274	8.05682	8.81332	8.49898	8.45938	8.4282
ILMN_1770467	GAGE7	-0.0201663	0.997814	-0.201972	0.310773	-0.0970684	0.745341	-0.566565	0.000957977	0.114805	0.666958	0.681369	0.000338257	-0.74837	6.62263e-06	0.0379027	0.89585	0.786273	1.08856e-05	-0.181805	0.63492	-0.076902	0.903053	0.104903	0.898191	11.5543	11.2028	11.3832	11.3335	10.7134	10.9106	10.7387	10.4813	11.4182	11.5685	11.4327	11.3598
ILMN_1801443	TSKU	-0.0219365	0.997814	-0.306633	0.0496472	-0.641835	2.58948e-05	-0.33105	0.0383375	0.346891	0.0344475	0.677942	6.27063e-05	-0.615747	2.59339e-05	-0.273008	0.0819772	0.342739	0.0385947	-0.284696	0.315128	-0.619899	0.0074641	-0.335203	0.399371	9.88826	9.87534	9.91137	9.80836	9.47702	9.62448	9.27421	9.21403	10.2109	10.2464	9.57516	9.59856
ILMN_3242920	GAGE12F	0.0623824	0.997255	0.124173	0.534778	0.0661849	0.822211	-0.664274	2.23707e-05	0.00700257	0.983123	0.671276	8.37321e-05	-0.602483	4.10969e-05	0.0108052	0.968456	0.613288	0.000108944	0.0617911	0.889891	0.00380259	0.995878	-0.0579885	0.946768	13.4326	13.4678	13.4304	13.5949	12.7783	12.7937	12.9578	12.8625	13.4898	13.4247	13.5683	13.4785
ILMN_1735157	GALNT12	-0.198803	0.978564	-0.375865	0.0152029	-0.39343	0.0144452	-0.14503	0.4794	0.524191	0.00102371	0.669221	0.000112861	-0.322092	0.0329474	0.329564	0.0340867	0.651656	5.58571e-05	-0.177062	0.605837	-0.194627	0.637747	-0.0175651	0.985931	8.3246	8.15796	7.95512	8.12984	8.08506	8.10744	7.75647	7.6843	8.81274	8.71821	8.32727	8.41681
ILMN_1741422	FUT8	0.276541	0.978564	-0.289261	0.189207	-0.253982	0.328135	-0.215454	0.389206	0.452473	0.0350366	0.667927	0.0031703	-0.781256	4.2376e-05	-0.0780498	0.800576	0.703207	0.000624579	-0.565802	0.0769712	-0.530523	0.136119	0.0352792	0.978138	7.77663	7.17911	7.83198	7.67684	7.47299	7.05184	7.03159	6.91473	7.79482	8.06587	7.61579	7.73694
ILMN_1706015	FAM43A	0.000967328	0.999481	1.67839	5.56063e-14	0.558876	0.000929257	-0.749047	1.6469e-05	-0.0819788	0.779358	0.667068	0.000441086	0.928381	9.96827e-08	0.47593	0.00356045	-0.452451	0.0114388	1.67743	1.49665e-09	0.557909	0.0434184	-1.11952	4.67296e-05	8.64988	8.70939	8.76672	8.59449	7.88225	7.97893	9.4983	9.71966	8.52314	8.67217	8.97151	9.34155
ILMN_3197767	LOC645691	0.0527625	0.997814	-0.0439722	0.877817	-0.406798	0.0217913	-0.201358	0.332539	0.465531	0.00854882	0.666889	0.000441086	-0.298092	0.0782832	0.00597138	0.984608	0.304064	0.123375	-0.0967347	0.830795	-0.45956	0.127043	-0.362825	0.42235	10.1648	10.1306	10.4216	9.97929	9.96856	9.92407	9.95144	9.85324	10.7152	10.5112	10.1869	10.2259
ILMN_3235101	LOC100133985	-0.0523914	0.997814	0.0701259	0.789784	-0.0984063	0.743123	-0.691672	7.06452e-05	-0.0253535	0.945549	0.666318	0.000502055	-0.569155	0.000433503	-0.0713683	0.786508	0.497786	0.00532378	0.122517	0.778935	-0.0460148	0.949682	-0.168532	0.806559	7.94113	7.48395	7.73206	7.58824	7.00511	7.03662	7.15931	7.02268	7.67073	7.70364	7.51576	7.6618
ILMN_2136133	PABPC1	0.0552426	0.997814	-0.10961	0.708572	-0.235202	0.394091	-0.176239	0.519495	0.482448	0.0263398	0.658687	0.00458085	-0.341092	0.0953505	0.192003	0.446945	0.533095	0.0130697	-0.164852	0.7422	-0.290444	0.564778	-0.125592	0.89802	11.036	10.2818	10.5987	10.8297	10.5246	10.4408	10.5065	10.2396	11.2082	11.0746	10.8671	10.9452
ILMN_3289659	LOC645548	-0.0678287	0.997255	1.03648	1.05089e-08	0.793525	3.41498e-06	-0.647401	0.00013565	0.011152	0.976707	0.658553	0.000441086	0.456913	0.00385064	0.872506	3.39516e-07	0.415593	0.0198353	1.10431	7.8552e-06	0.861354	0.000477536	-0.24296	0.669987	7.79763	7.74195	7.70028	7.70364	7.02434	7.22044	8.36726	7.95049	7.81239	7.74949	8.53846	8.61047
ILMN_2137789	KLF4	0.059847	0.997255	2.99266	4.68528e-21	1.75428	3.55694e-14	-1.10954	1.02737e-08	-0.452483	0.0129793	0.65706	0.000688181	1.82327	6.65267e-15	1.24195	2.35061e-10	-0.581315	0.00118884	2.93281	1.05257e-15	1.69443	2.31097e-09	-1.23838	1.20628e-05	7.659	7.84931	7.6584	7.9696	6.59003	6.69918	9.45304	9.82149	7.33468	7.26866	8.99655	9.11535
ILMN_1742460	PCDH11X	-0.184563	0.986712	0.179792	0.389073	-0.392831	0.0308057	-0.126024	0.604942	0.52784	0.00293116	0.653865	0.00067825	0.23833	0.187905	0.319572	0.0695559	0.0812419	0.795834	0.364355	0.235045	-0.208268	0.65078	-0.572623	0.0872836	5.66321	6.02837	5.68241	5.64004	5.84502	5.59451	6.03937	5.75975	6.33414	6.41313	5.97339	5.98821
ILMN_1730351	FLJ35767	0.0852955	0.997255	-0.477218	0.00134435	-0.361033	0.0246887	-0.407809	0.00896523	0.241973	0.184241	0.649781	0.000138733	-0.970322	3.99626e-09	-0.204356	0.233217	0.765966	2.60591e-06	-0.562513	0.0142901	-0.446329	0.0885276	0.116184	0.86694	7.48096	7.56568	7.54489	7.67234	7.15297	7.07806	6.67797	6.59862	7.77334	7.75725	7.46334	7.34518
ILMN_3235221	LOC644936	0.00829225	0.999277	0.0471011	0.885311	-0.25023	0.316392	-0.506106	0.0100012	0.141708	0.629842	0.647814	0.00311032	-0.467297	0.0106836	-0.116814	0.667133	0.350484	0.115728	0.0388088	0.948232	-0.258522	0.597996	-0.297331	0.634361	11.7727	11.2397	11.4434	11.5856	11.0013	10.9988	11.087	11.0074	11.6349	11.6609	11.146	11.6494
ILMN_3241021	RNY4	-0.126089	0.994666	0.102134	0.671321	-0.185448	0.435937	-0.332062	0.0698985	0.309717	0.110535	0.641779	0.000771614	-0.103839	0.634913	0.250358	0.176625	0.354197	0.0618022	0.228223	0.523161	-0.0593586	0.932286	-0.287582	0.587562	6.6136	6.65096	6.44611	6.56627	6.3725	6.22793	6.40981	6.39489	7.15499	6.729	6.86333	6.64976
ILMN_1754864	SLC25A18	0.00249352	0.999277	1.9249	3.57527e-16	1.59987	7.85984e-14	-1.31969	3.28784e-11	-0.67898	5.23083e-05	0.640709	0.000441086	0.602721	0.000102846	0.918394	6.6075e-08	0.315673	0.0880807	1.92241	1.97114e-11	1.59737	2.18073e-09	-0.325036	0.471199	7.41227	7.32601	7.46072	7.28255	6.01244	6.08647	8.07958	7.86914	6.73199	6.64833	8.42404	8.15602
ILMN_1724734	UQCC	-0.0303718	0.997814	-0.000691724	0.998606	-0.251474	0.226218	-0.697272	5.18679e-05	-0.0613985	0.843627	0.635874	0.000779794	-0.667592	3.95006e-05	-0.282501	0.112071	0.385091	0.0362114	0.02968	0.955056	-0.221102	0.614194	-0.250782	0.656967	6.83838	6.55838	6.7155	6.62053	5.96322	6.03901	6.00516	5.99568	6.76627	6.5077	6.53239	6.23863
ILMN_1679995	MPP6	-0.0669408	0.997255	0.0284682	0.922304	-0.748023	5.24382e-06	0.421128	0.010745	1.05549	7.80938e-09	0.634357	0.000447292	0.516537	0.000702896	0.374404	0.0184873	-0.142134	0.555744	0.095409	0.823623	-0.681082	0.00532163	-0.776491	0.00384489	7.85921	8.09394	7.78779	8.03148	8.34193	8.45348	8.49249	8.35985	9.0533	9.01083	8.31946	8.24862
ILMN_1700257	C4orf32	0.140352	0.994666	-1.30198	1.24029e-11	-1.03715	4.62883e-09	-0.50496	0.00177775	0.127854	0.592468	0.632815	0.00041882	-1.94729	9.44252e-17	-1.04965	2.17303e-09	0.897645	2.98619e-07	-1.44233	1.28751e-08	-1.1775	1.22743e-06	0.264831	0.598784	9.50589	9.34682	9.67773	9.45568	8.8193	9.02349	7.67552	7.5633	9.5335	9.57492	8.54981	8.48431
ILMN_2089329	SPRY2	0.00796405	0.999277	0.356835	0.0213271	-0.210048	0.286951	-0.682497	1.7011e-05	-0.0531661	0.852979	0.629331	0.000269622	-0.333626	0.0254323	-0.271179	0.091699	0.0624472	0.830878	0.348871	0.195156	-0.218013	0.573195	-0.566884	0.0465311	7.68633	7.56963	7.61864	7.65326	7.00338	6.88759	7.30484	7.29981	7.64463	7.50501	7.29071	7.43883
ILMN_1678757	BCYRN1	0.0407436	0.997814	0.0914305	0.693705	0.0122889	0.976946	-0.852955	6.65723e-07	-0.22447	0.264492	0.628485	0.000525846	-0.802268	7.64304e-07	-0.252925	0.143551	0.549343	0.00105807	0.0506869	0.919285	-0.0284547	0.969255	-0.0791416	0.924507	11.3892	11.1568	11.2747	11.3528	10.4923	10.3478	10.4528	10.5702	10.9682	11.1289	10.967	11.1547
ILMN_1713124	AKR1C3	0.0612388	0.997255	0.622689	3.42786e-05	1.66613	3.97417e-15	-0.129828	0.528688	0.492805	0.00165029	0.622634	0.000249514	0.431621	0.00267054	2.0977	3.15679e-18	1.66607	3.14657e-14	0.56145	0.0140586	1.60489	3.8768e-10	1.04344	2.58681e-05	5.57044	5.57057	5.53898	5.72451	5.43419	5.44717	6.0923	6.03443	6.03186	6.09476	7.73875	7.72013
ILMN_1651838	RND1	-0.0333855	0.997814	-0.542487	0.000413379	-1.06149	1.81132e-09	-0.333894	0.0452049	0.285905	0.111901	0.6198	0.000447292	-0.842996	1.68493e-07	-0.742204	2.44864e-06	0.100791	0.704444	-0.509101	0.0377562	-1.02811	1.16106e-05	-0.519008	0.093413	6.28529	6.49297	6.29786	6.41362	6.04503	6.06544	5.45733	5.56817	6.58032	6.76975	5.63207	5.59501
ILMN_1810835	SPRR3	-0.0511205	0.997814	-0.752613	9.56345e-06	-0.395884	0.0276804	-2.0944	2.38789e-16	-1.47619	7.17287e-12	0.618216	0.0012726	-2.7959	1.06874e-20	-1.82095	4.80194e-15	0.974945	1.99747e-07	-0.701493	0.00509602	-0.344764	0.331286	0.356729	0.436441	9.7931	10.0488	9.92407	9.81561	7.82814	7.82497	6.96935	7.17854	8.26053	8.62901	8.09087	8.0069
ILMN_1794492	HOXC6	-0.0808234	0.997255	-0.294818	0.102633	-0.564862	0.000852969	-0.982849	1.00534e-07	-0.366647	0.0482578	0.616202	0.00128705	-1.19684	3.41415e-10	-0.850685	7.69336e-07	0.346158	0.0690028	-0.213994	0.556641	-0.484038	0.101002	-0.270044	0.618934	9.78994	9.62715	9.6283	9.62715	8.79036	8.66103	8.48866	8.37311	9.24017	9.44363	8.97784	8.57624
ILMN_1810127	ZNF789	-0.234685	0.978564	0.229815	0.202497	-0.198653	0.356278	-0.466005	0.0044078	0.147253	0.524656	0.613258	0.000688181	-0.00150411	0.99478	0.183285	0.336496	0.184789	0.401839	0.464501	0.0733806	0.0360325	0.959797	-0.428468	0.245572	8.75302	8.77824	8.64553	8.41635	8.20556	8.39368	8.44187	8.61701	8.84967	8.97609	8.7807	8.64776
ILMN_1794875	AGPAT9	0.256307	0.966119	-0.508089	0.000885358	-0.837368	3.39429e-07	-0.227384	0.211909	0.384882	0.0213543	0.612266	0.000499614	-0.99178	4.44837e-09	-0.708793	5.22759e-06	0.282987	0.121337	-0.764396	0.000771328	-1.09368	3.38421e-06	-0.329279	0.436362	6.91164	6.98931	7.16083	7.25273	6.75408	6.6921	6.34239	6.08762	7.29241	7.37831	6.45531	6.54067
ILMN_2169439	ITGAV	0.157417	0.986712	0.172961	0.352239	-0.0925827	0.732132	-0.0812133	0.73947	0.531003	0.000875686	0.612217	0.000442423	-0.0656692	0.761088	0.281004	0.08022	0.346673	0.0418992	0.0155441	0.976579	-0.249999	0.491437	-0.265544	0.580006	9.01325	8.91	9.16259	9.07549	8.84163	8.9192	8.96962	9.13712	9.4228	9.56246	9.44859	9.35151
ILMN_1796755	ITGB5	0.132861	0.994666	0.0967423	0.667388	-0.0922514	0.742178	-0.680857	3.07283e-05	-0.0731363	0.794042	0.607721	0.000680563	-0.716975	4.8112e-06	-0.298249	0.0685613	0.418727	0.0134201	-0.0361185	0.942943	-0.225112	0.574127	-0.188994	0.751739	8.32843	8.43128	8.57028	8.45515	7.83469	7.5633	7.74327	7.84821	8.32328	8.29016	8.28875	8.14018
ILMN_3265742	LOC100130835	0.0157115	0.999038	0.0542248	0.843903	0.0139728	0.974339	-0.633565	0.000215419	-0.0264801	0.942032	0.607084	0.00146456	-0.595051	0.000209571	-0.0282189	0.92252	0.566832	0.00121095	0.0385133	0.942486	-0.00173879	0.998119	-0.040252	0.96881	9.34715	9.08786	9.16667	9.29977	8.67217	8.49572	8.81861	8.45772	9.19401	9.18804	9.21657	9.19343
ILMN_1796339	PLEKHA2	-0.0142961	0.999277	-1.09186	1.73089e-09	-1.29599	2.58727e-11	0.290855	0.104031	0.894231	3.47224e-07	0.603377	0.000975571	-0.786711	1.26619e-06	-0.387464	0.0153491	0.399247	0.0220227	-1.07757	7.62219e-06	-1.2817	3.03216e-07	-0.20413	0.730632	8.64524	8.80254	8.79272	8.62647	9.04297	8.98652	8.07784	7.76792	9.64828	9.58796	8.26161	8.38265
ILMN_1757020	CDH8	-0.0845022	0.997255	0.029121	0.917981	-0.152817	0.503834	-0.771912	2.53726e-06	-0.17065	0.419582	0.601262	0.000626766	-0.658289	1.49808e-05	-0.238965	0.157209	0.419324	0.0114388	0.113623	0.777147	-0.0683149	0.907134	-0.181938	0.759592	7.28093	7.23016	7.06689	7.2752	6.47097	6.4963	6.40529	6.62022	7.117	7.05279	6.94006	6.9241
